# Supplementary material for: Alkoxide-functionalized imidazolium betaines for CO2 activation and catalytic transformation
Source: Royal Society of Chemistry journal article supplement (doi:10.1039/c3gc42346h), 2013-12-20

**Supporting Information for:**  
**Alkoxide-Functionalized Imidazolium Betaine for CO<sub>2</sub>**  
**Activation and Catalytic Transformation**

Yan-Bo Wang, Dong-Sheng Sun, Hui Zhou, Wen-Zhen Zhang, and Xiao-Bing Lu\*

*State Key Laboratory of Fine Chemicals, Dalian University of Technology,*

*Dalian, 116024, China*

*E-mail: lxb-1999@163.com*

**Contents:**

|                                                                                                                                 |     |
|---------------------------------------------------------------------------------------------------------------------------------|-----|
| 1. Crystallography .....                                                                                                        | S2  |
| 2, Representative <sup>1</sup> H NMR and <sup>13</sup> C NMR comparison for <b>1</b> and <b>2</b> , <b>2</b> and <b>3</b> ..... | S3  |
| 3. <sup>1</sup> H NMR and <sup>13</sup> C NMR Spectra of <b>2a-2d</b> , <b>4a-5d</b> , alkylidene cyclic carbonates.....        | S12 |

## 1. Crystallography

Single crystals of complex **3c** suitable for X-ray structural analysis were obtained from a CH<sub>2</sub>Cl<sub>2</sub>/hexane solution at -30°C. Single crystals of complexes **4b** and **4c** suitable for X-ray structural analysis were obtained from a CH<sub>3</sub>OH/H<sub>2</sub>O solution at -10 °C. Diffraction data were collected at 220 K on a Bruker SMART-CCD diffractometer using graphite-monochromated Mo K $\alpha$  radiation ( $\lambda = 0.71073$  Å). The structures were solved by direct methods and refined by full-matrix least squares on  $F^2$ . All nonhydrogen atoms were refined anisotropically, and the hydrogen atoms were included in idealized positions. All calculations were performed using the SHELXTL crystallographic software packages. Details of the crystal data, data collections, and structure refinements are summarized in Table S1. CCDC-971545 (**3c**), CCDC-971543 (**4b**), and CCDC-971544 (**4c**) contain supplementary crystallographic data for this paper. These data can be obtained free of charge from The Cambridge Crystallographic Data Centre via [www.ccdc.cam.ac.uk/data\\_request/cif](http://www.ccdc.cam.ac.uk/data_request/cif).

Table S1. Crystal data and structural refinement details for complexes **3c**, **4b** and **4c**

|                          | <b>3c</b>                                                     | <b>4b</b>                                                      | <b>4c</b>                                                      |
|--------------------------|---------------------------------------------------------------|----------------------------------------------------------------|----------------------------------------------------------------|
| mol formula              | C <sub>10</sub> H <sub>19</sub> N <sub>2</sub> O <sub>5</sub> | C <sub>10</sub> H <sub>16</sub> N <sub>2</sub> OS <sub>2</sub> | C <sub>10</sub> H <sub>16</sub> N <sub>2</sub> OS <sub>2</sub> |
| mol wt                   | 247.27                                                        | 244.37                                                         | 244.37                                                         |
| cryst syst               | Orthorhombic                                                  | Monoclinic                                                     | Monoclinic                                                     |
| space group              | Pbcn                                                          | P2(1)/c                                                        | P2(1)/n                                                        |
| <i>a</i> /Å              | 12.1669(7)                                                    | 10.7382(3)                                                     | 7.0242(4)                                                      |
| <i>b</i> /Å              | 12.0650(7)                                                    | 10.2853(3)                                                     | 15.4761(9)                                                     |
| <i>c</i> /Å              | 19.281(1)                                                     | 11.9959(3)                                                     | 11.2508(7)                                                     |
| <i>α</i> /deg            | 90.00                                                         | 90.00                                                          | 90.00                                                          |
| <i>β</i> /deg            | 90.00                                                         | 114.837 (1)                                                    | 92.082 (1)                                                     |
| <i>γ</i> /deg            | 90.00                                                         | 90.00                                                          | 90.00                                                          |
| <i>V</i> /Å <sup>3</sup> | 2830.3(3)                                                     | 1202.35(6)                                                     | 1222.2 (1)                                                     |
| <i>Z</i>                 | 8                                                             | 4                                                              | 4                                                              |
| R <sub>int</sub>         | 0.0309                                                        | 0.0267                                                         | 0.0533                                                         |
| R1 ( <i>I</i> > 2σ)      | 0.108                                                         | 0.0345                                                         | 0.0518                                                         |
| wR2 ( <i>I</i> > 2σ)     | 0.405                                                         | 0.1000                                                         | 0.1340                                                         |
| GOF                      | 0.933                                                         | 1.051                                                          | 1.028                                                          |

**2, Representative  $^1\text{H}$  NMR and  $^{13}\text{C}$  NMR comparison for 1 and 2, 2 and 3.**

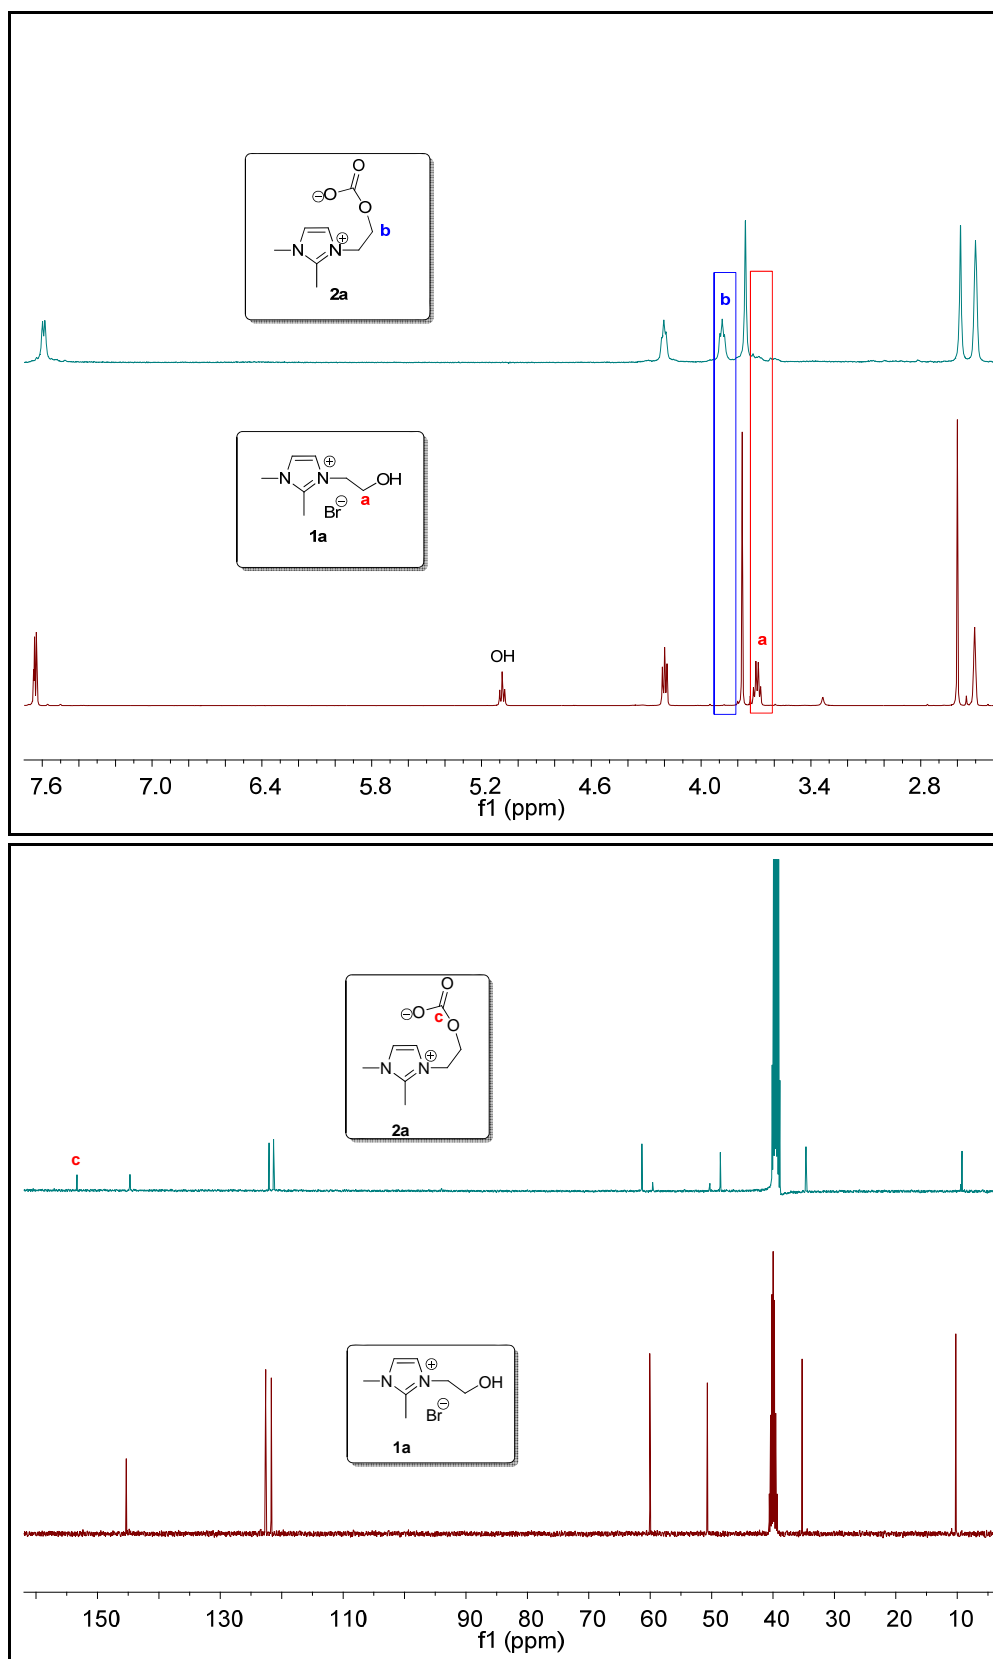

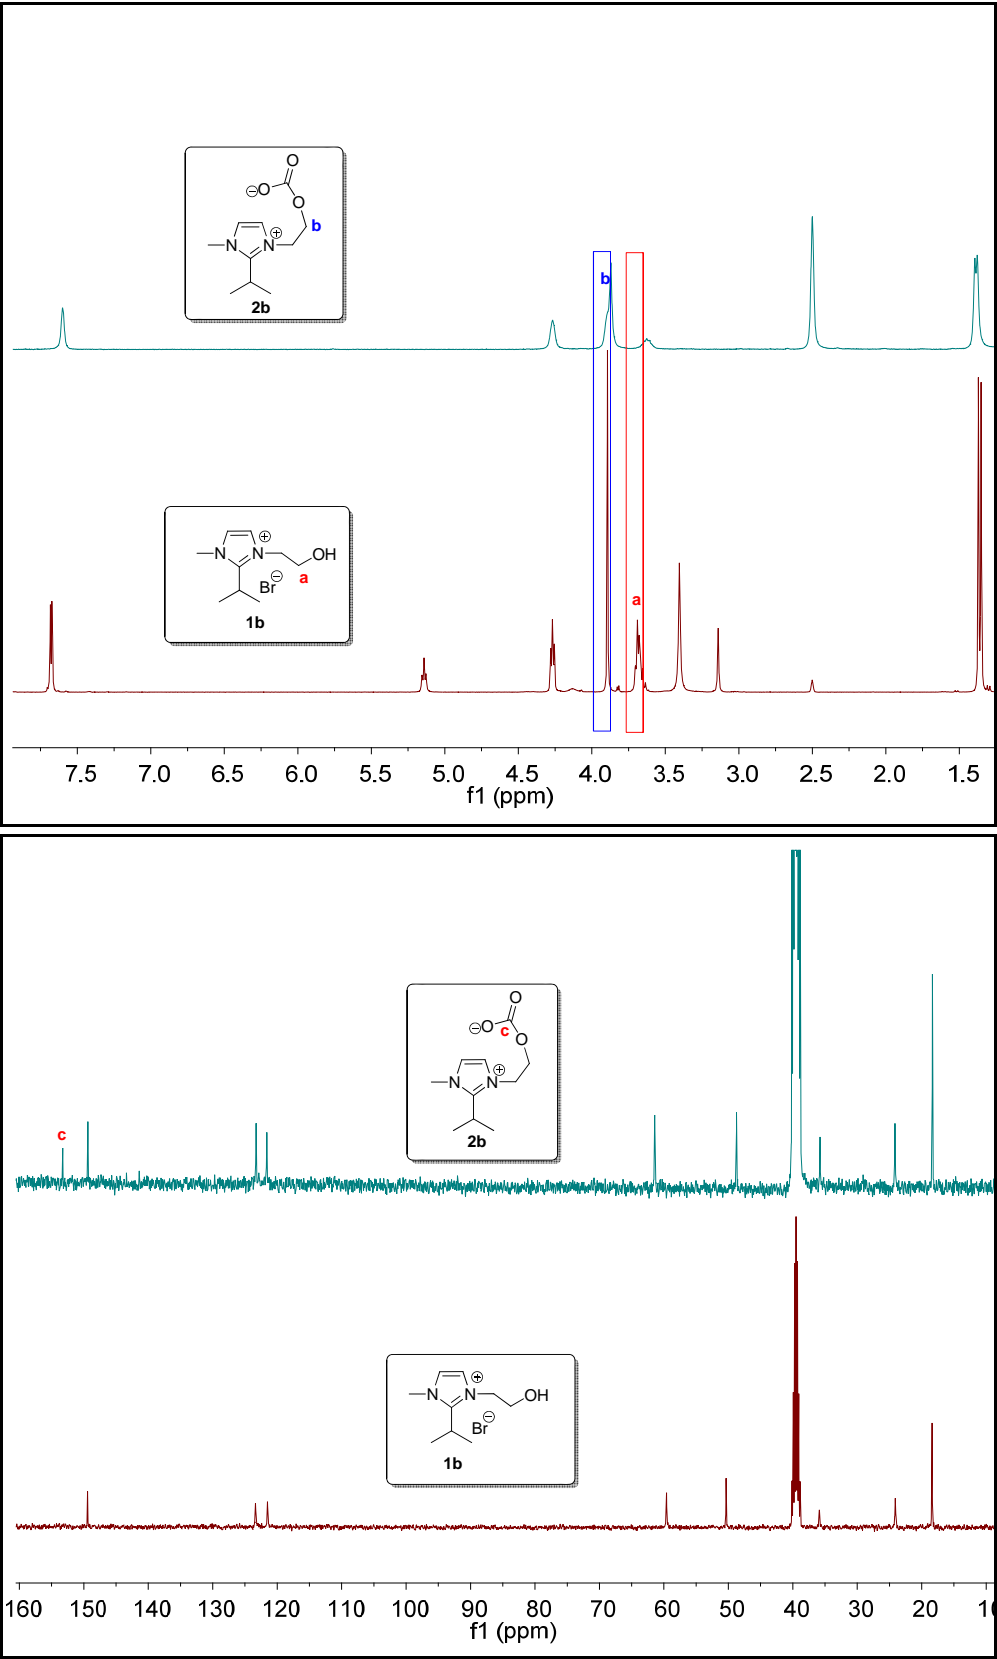

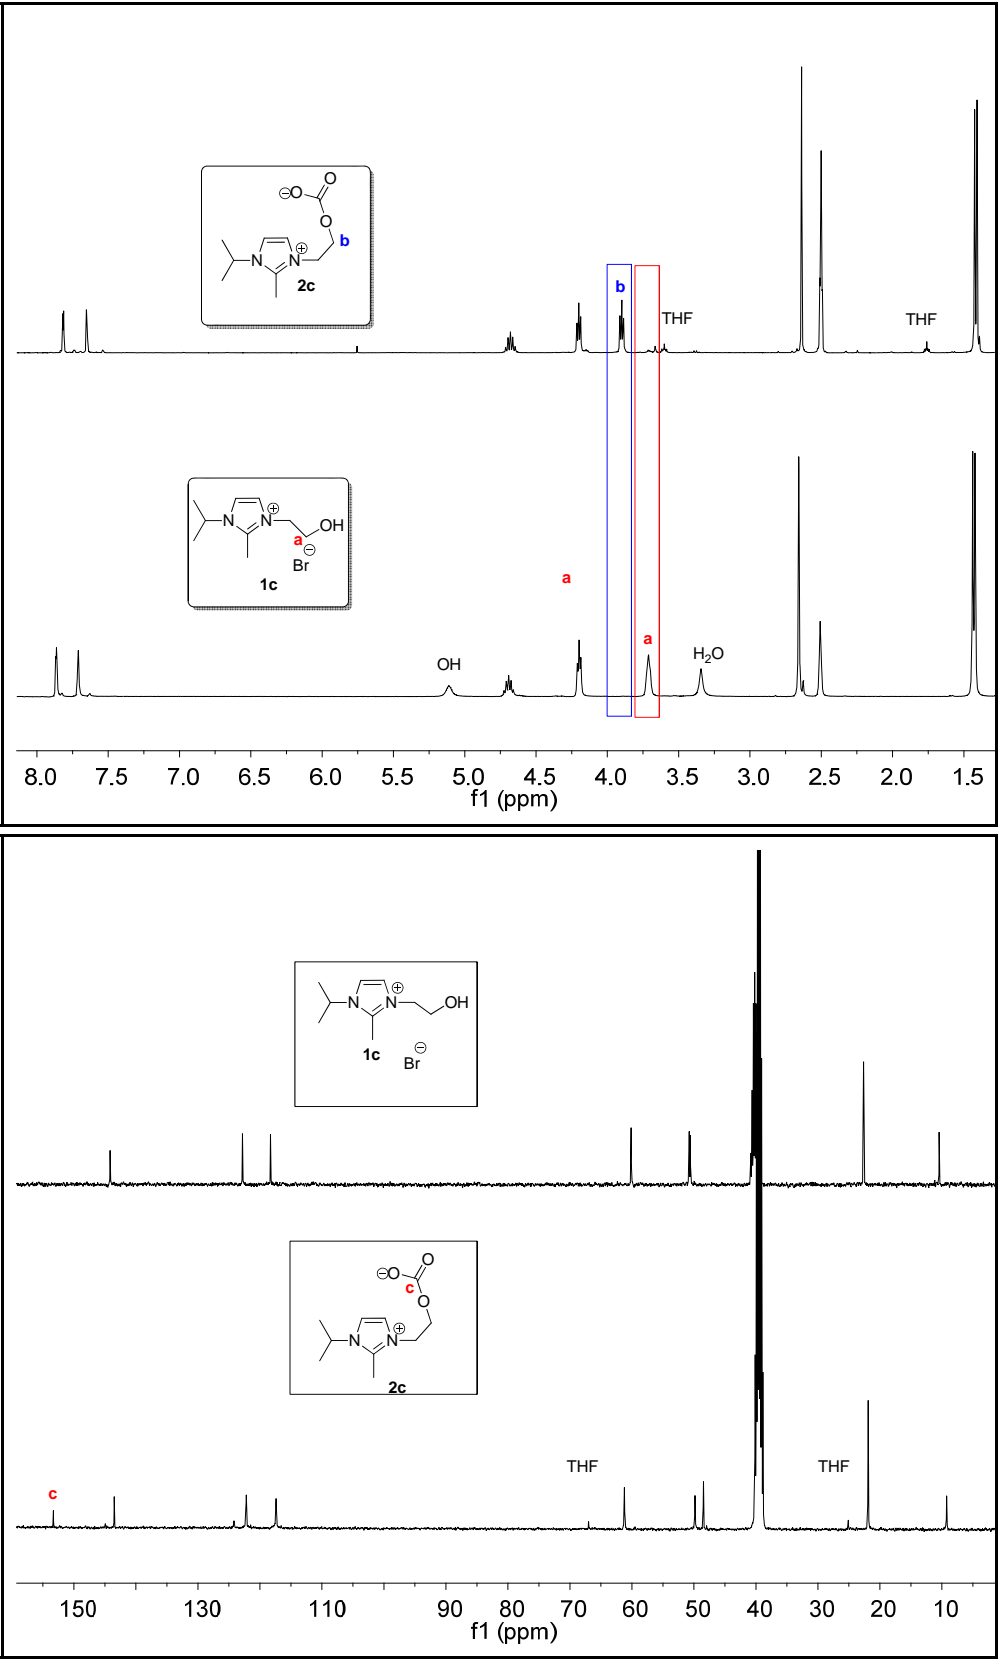

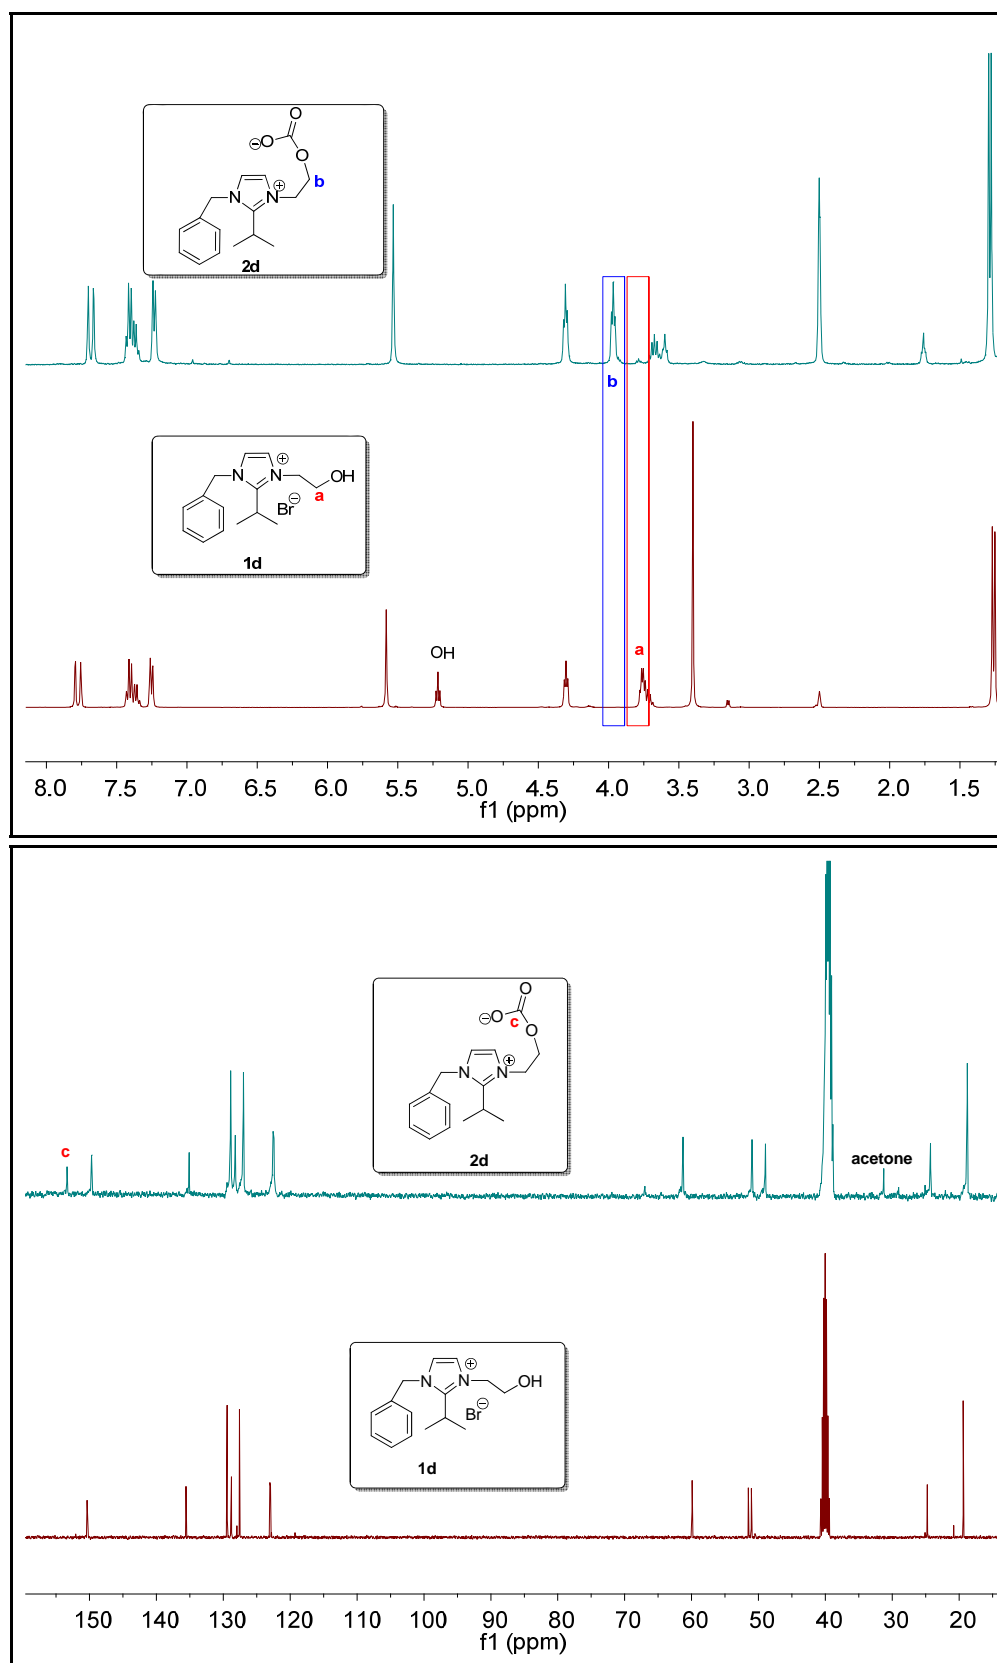

**Figure S1**  $^1\text{H}$  NMR and  $^{13}\text{C}$  NMR comparison for **1** and **2**

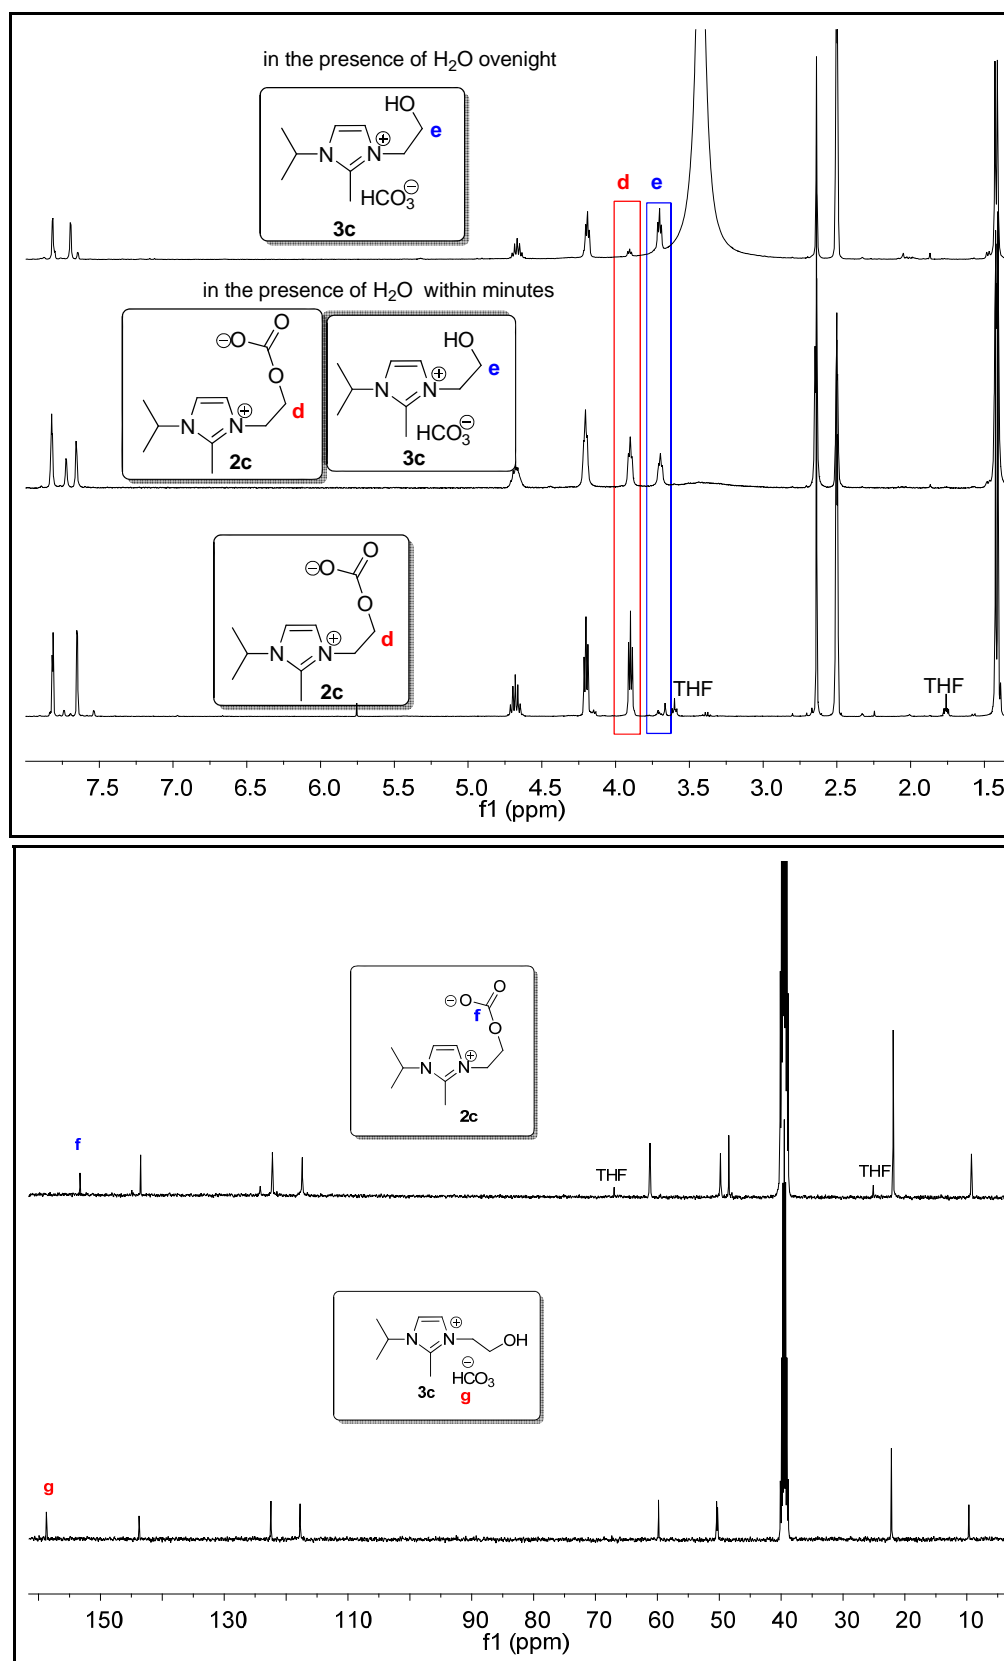

**Figure S2**  $^1\text{H}$  NMR and  $^{13}\text{C}$  NMR comparison for **2c** and **3c**



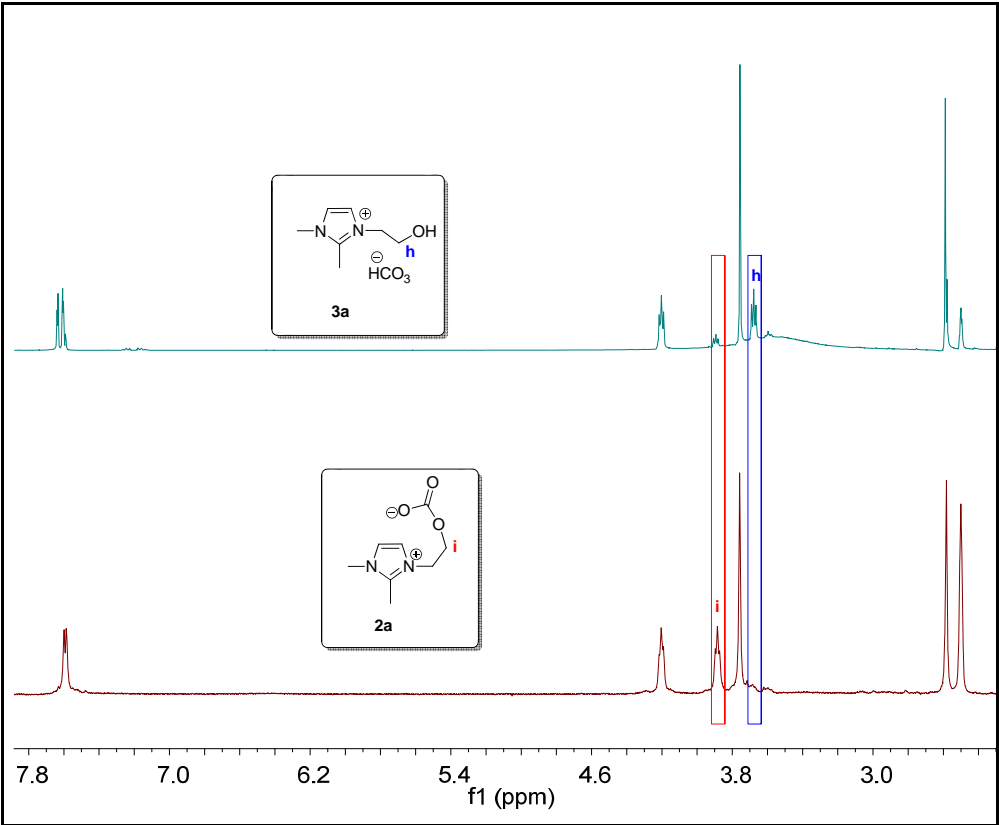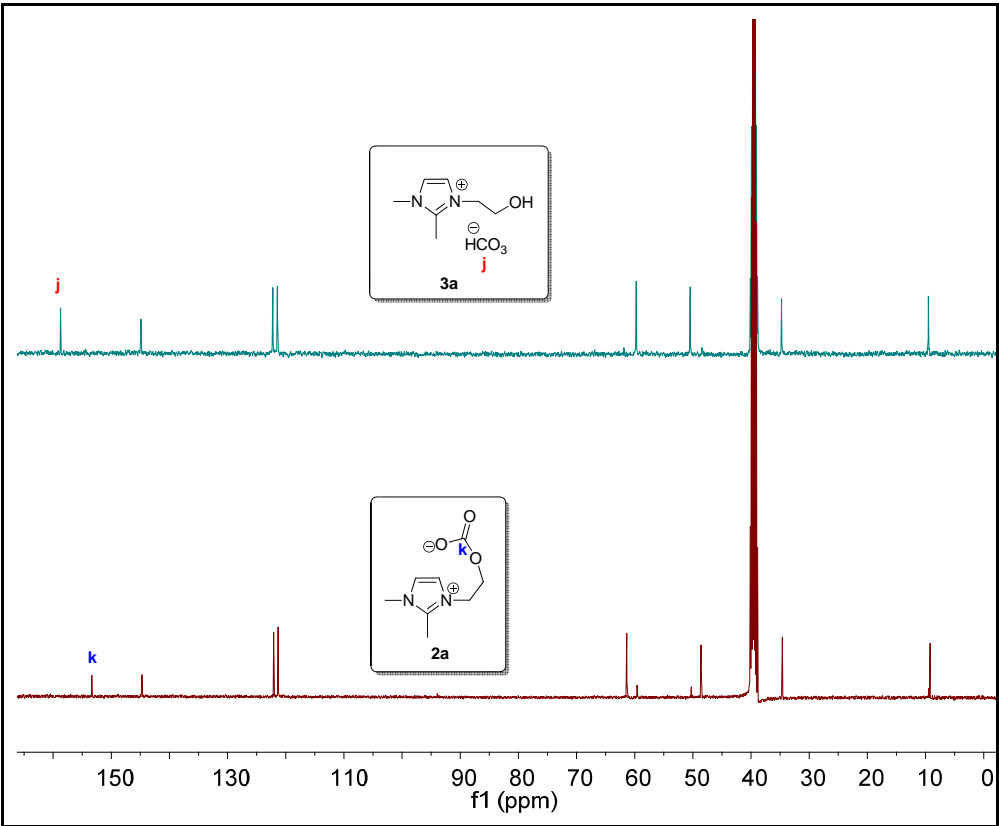

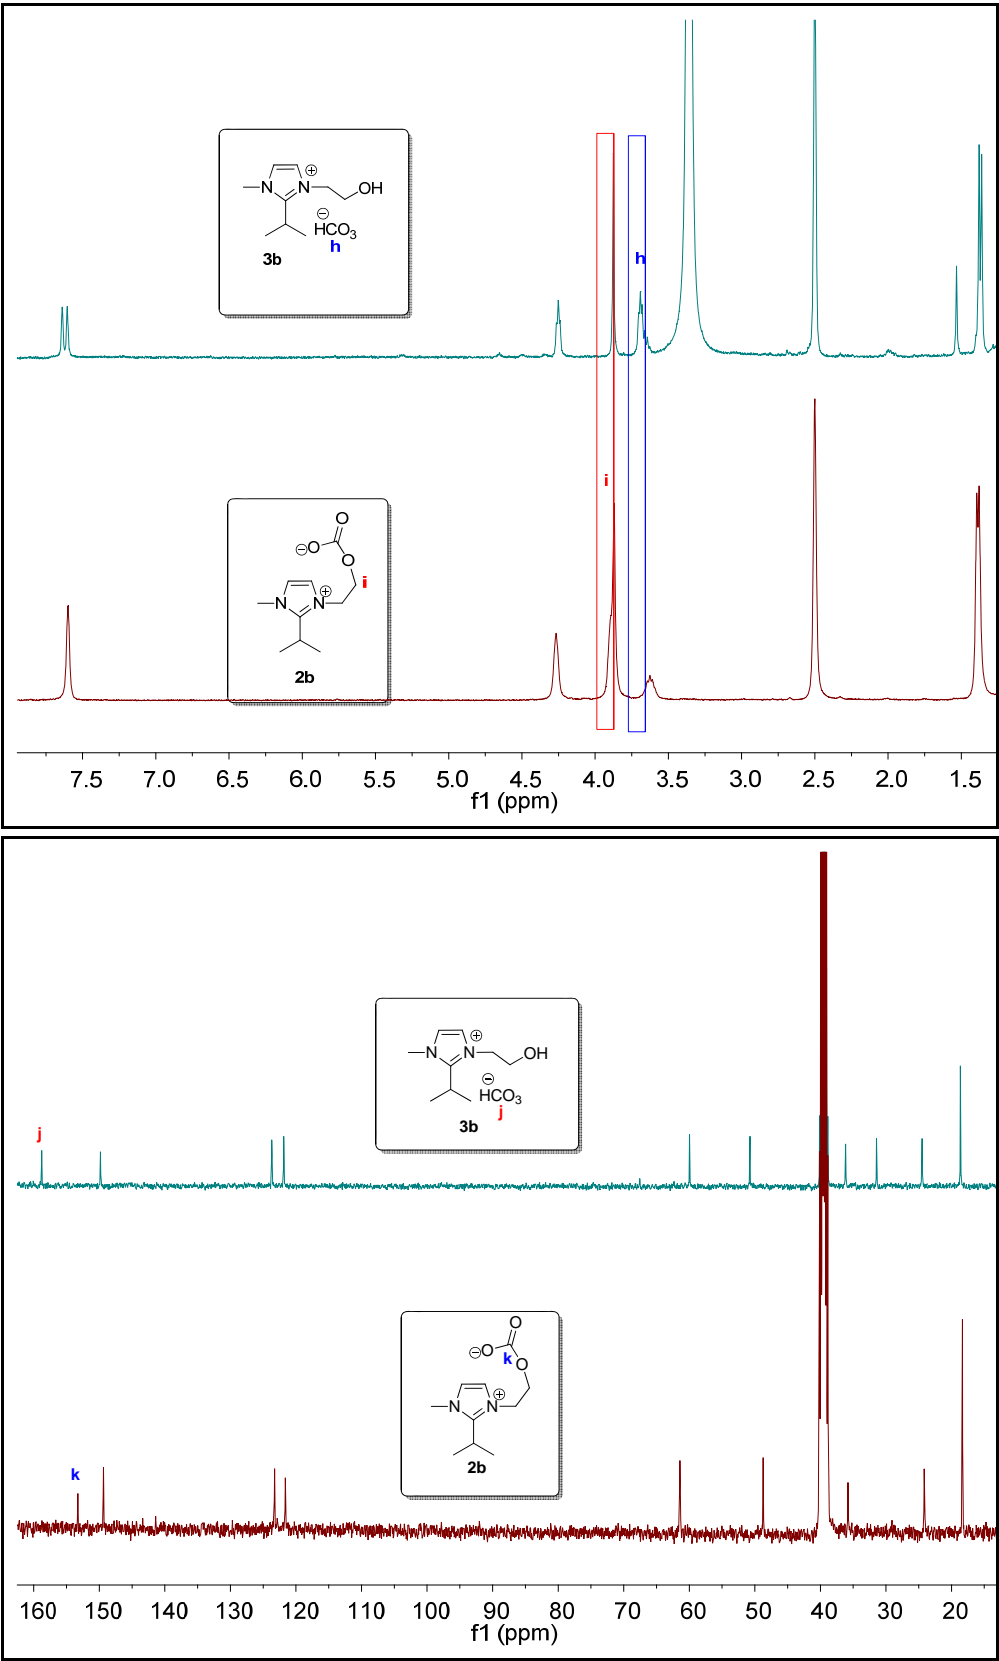

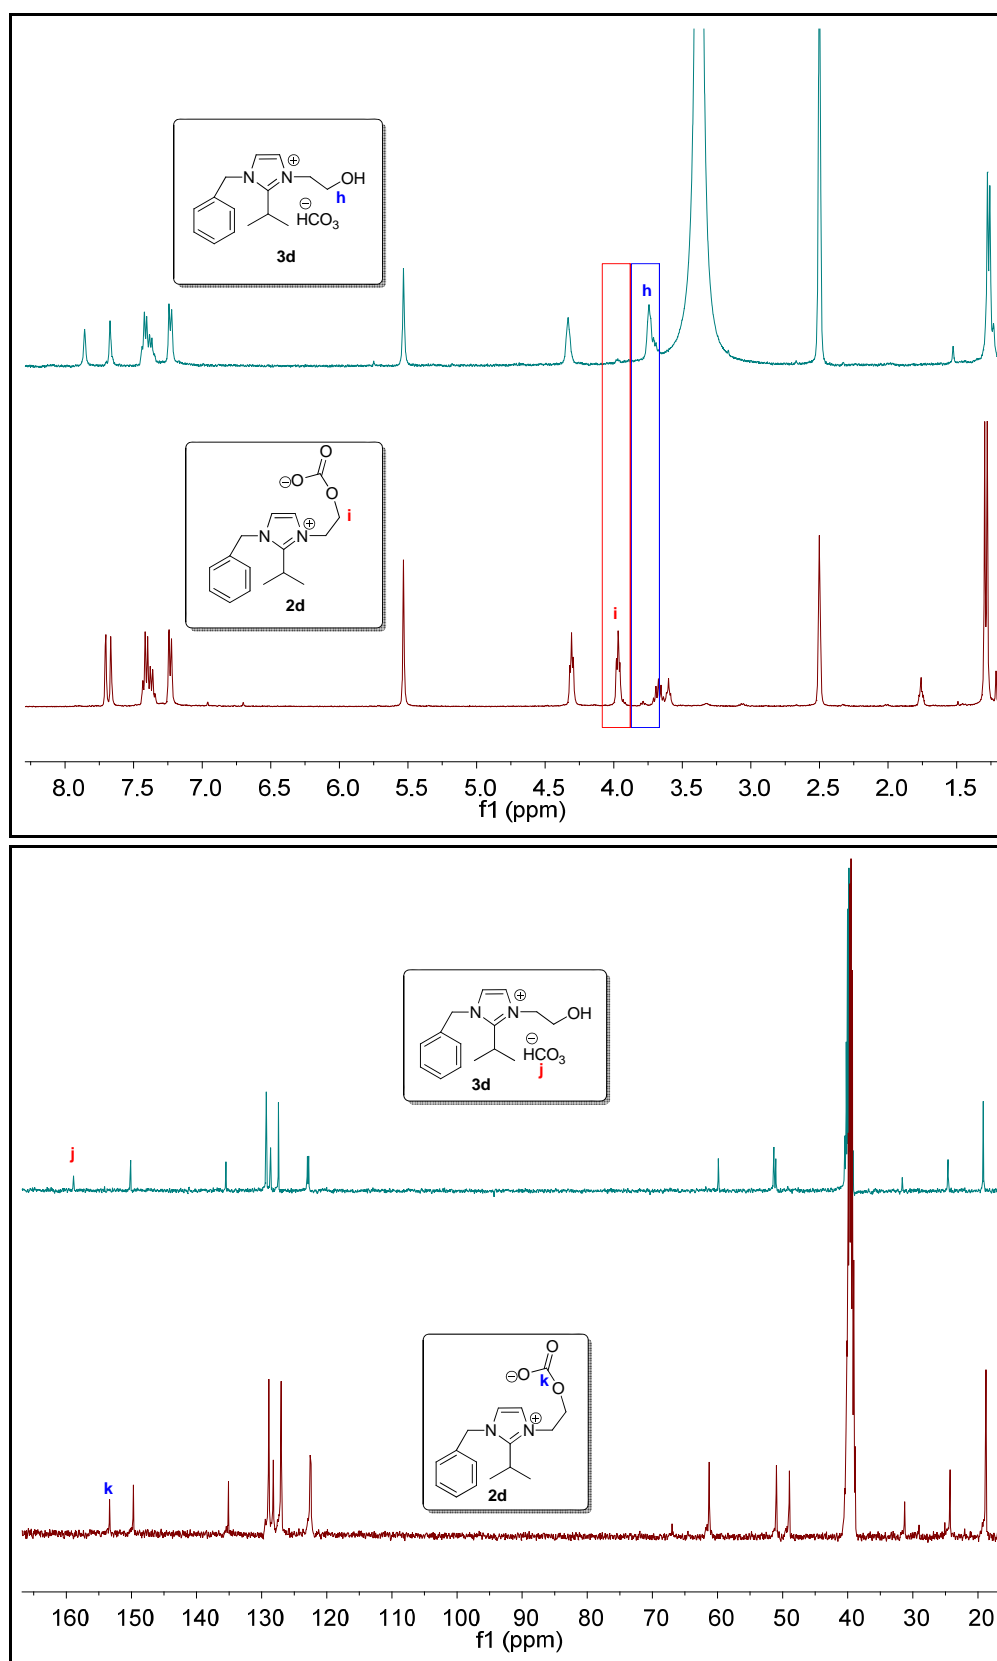

**Figure S3**  $^1\text{H}$  NMR and  $^{13}\text{C}$  NMR comparison for **2a-2b**, **2d** and **3a-3b**, **3d**.

### 3. $^1\text{H}$ NMR and $^{13}\text{C}$ NMR spectra of 2a-2d, 4a-4d and alkylidene cyclic carbonates (6a-6i)

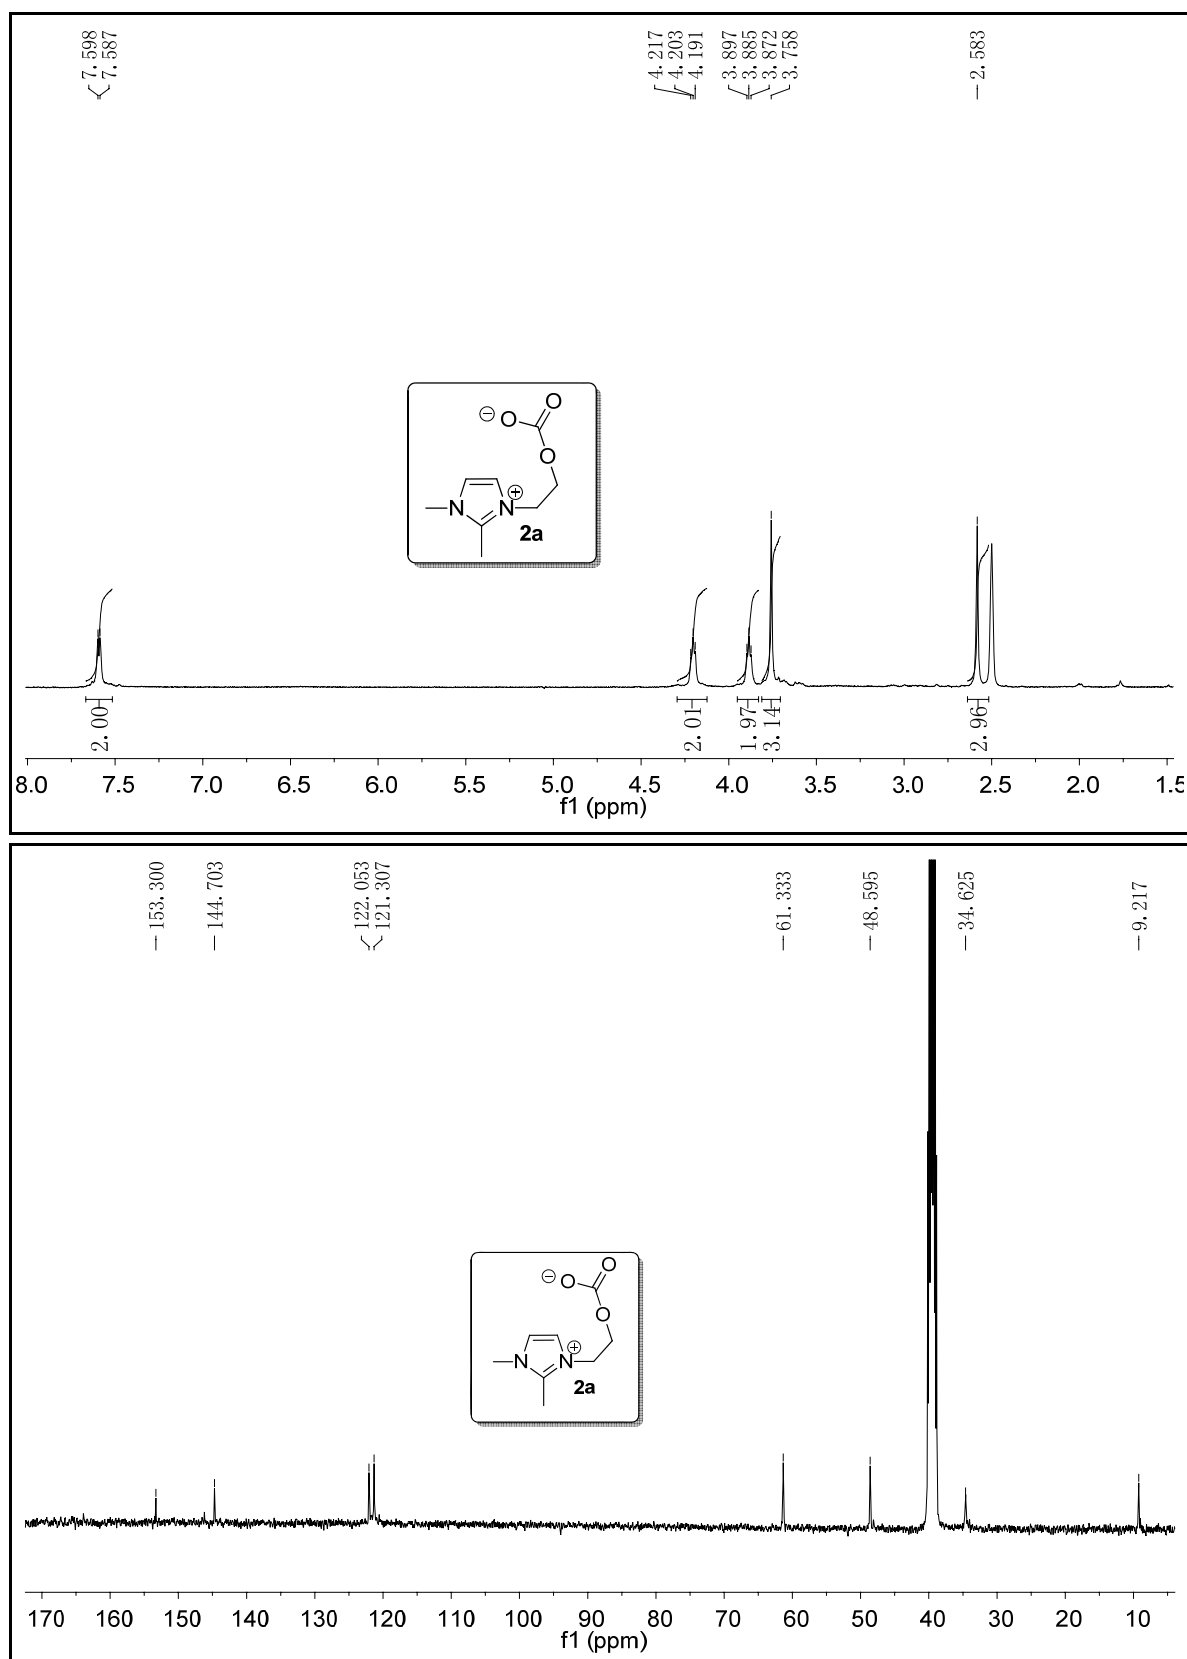

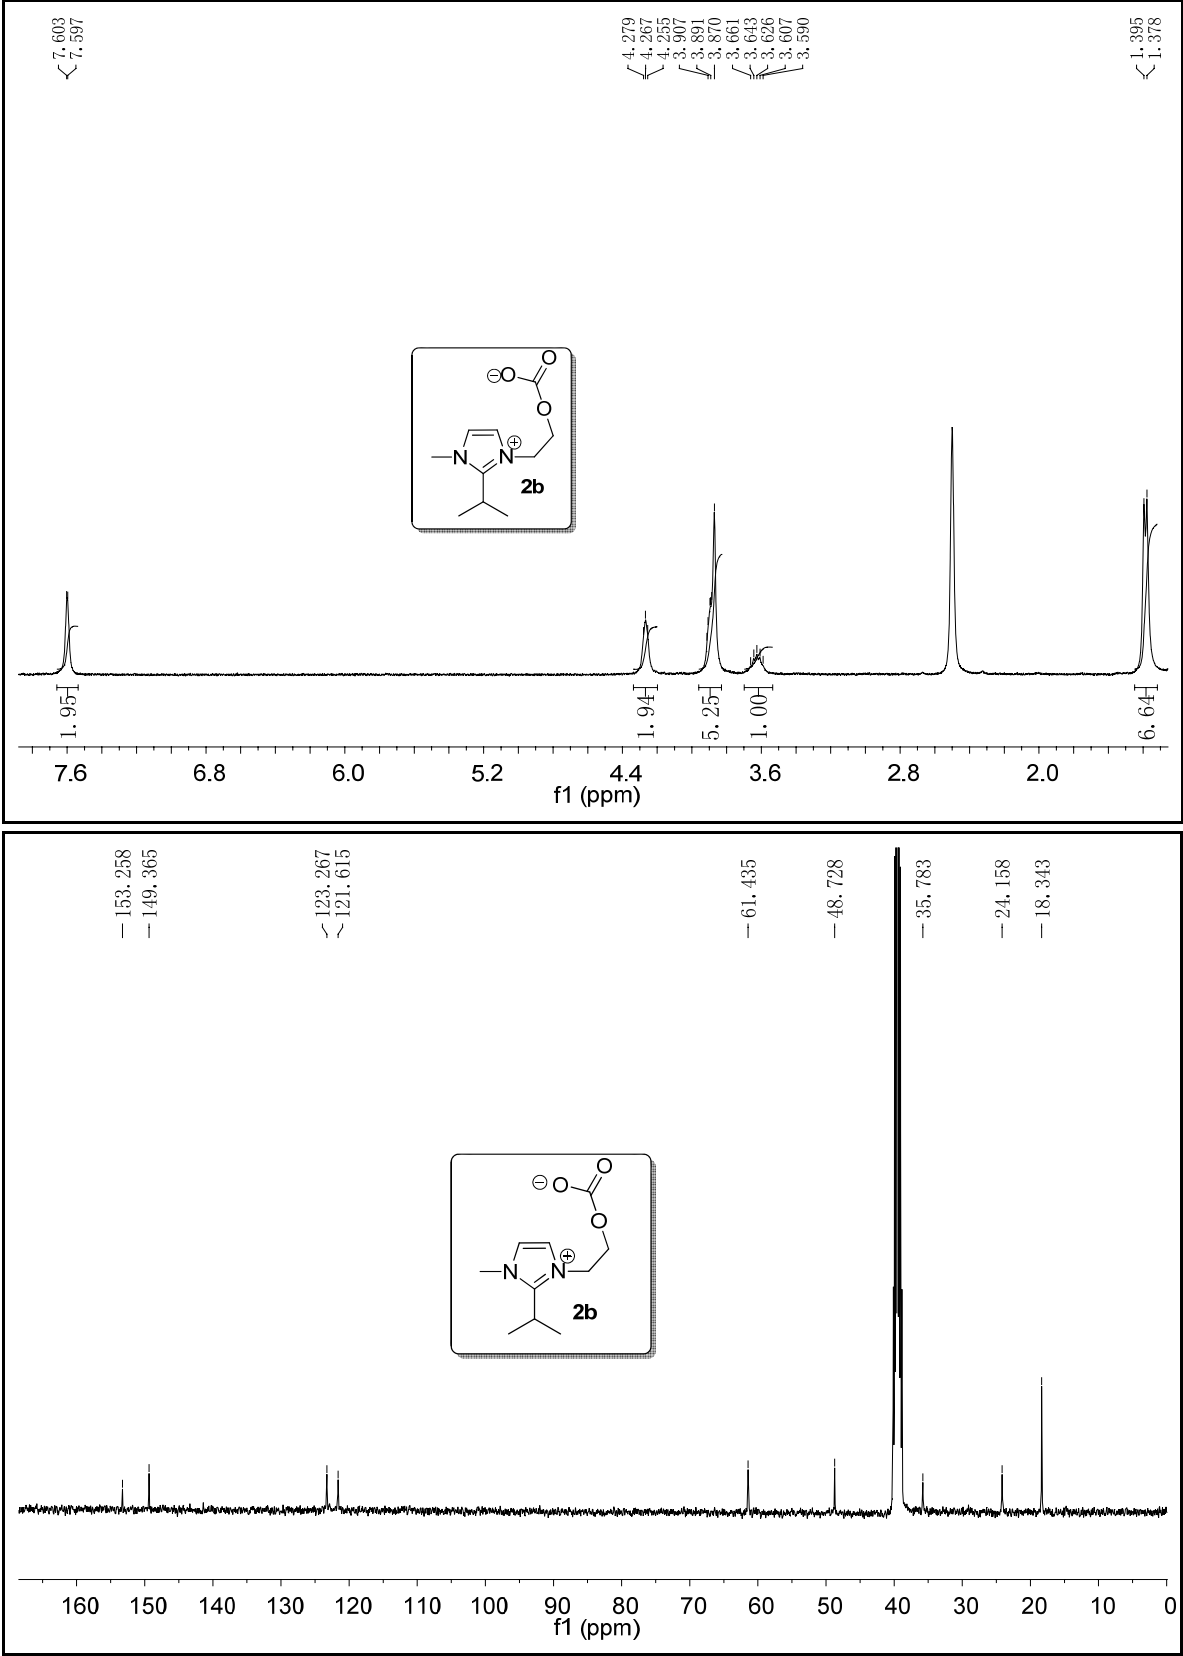

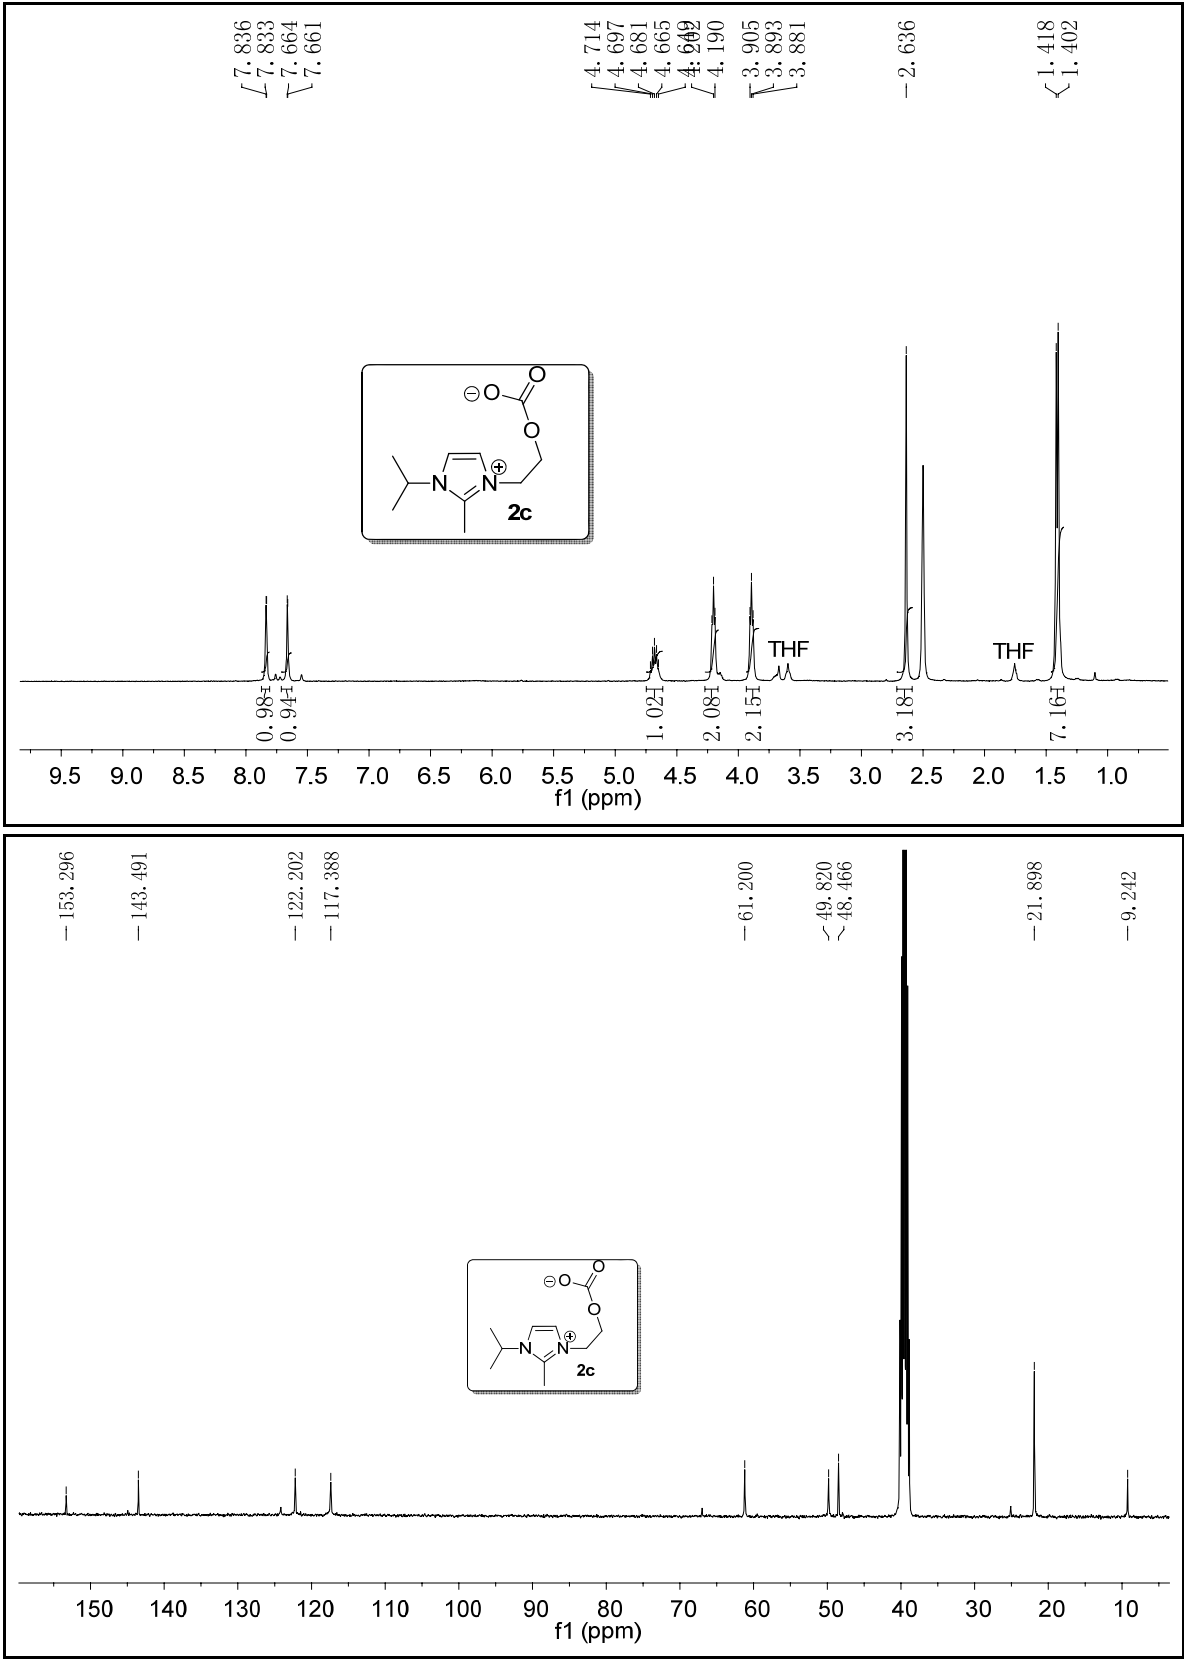

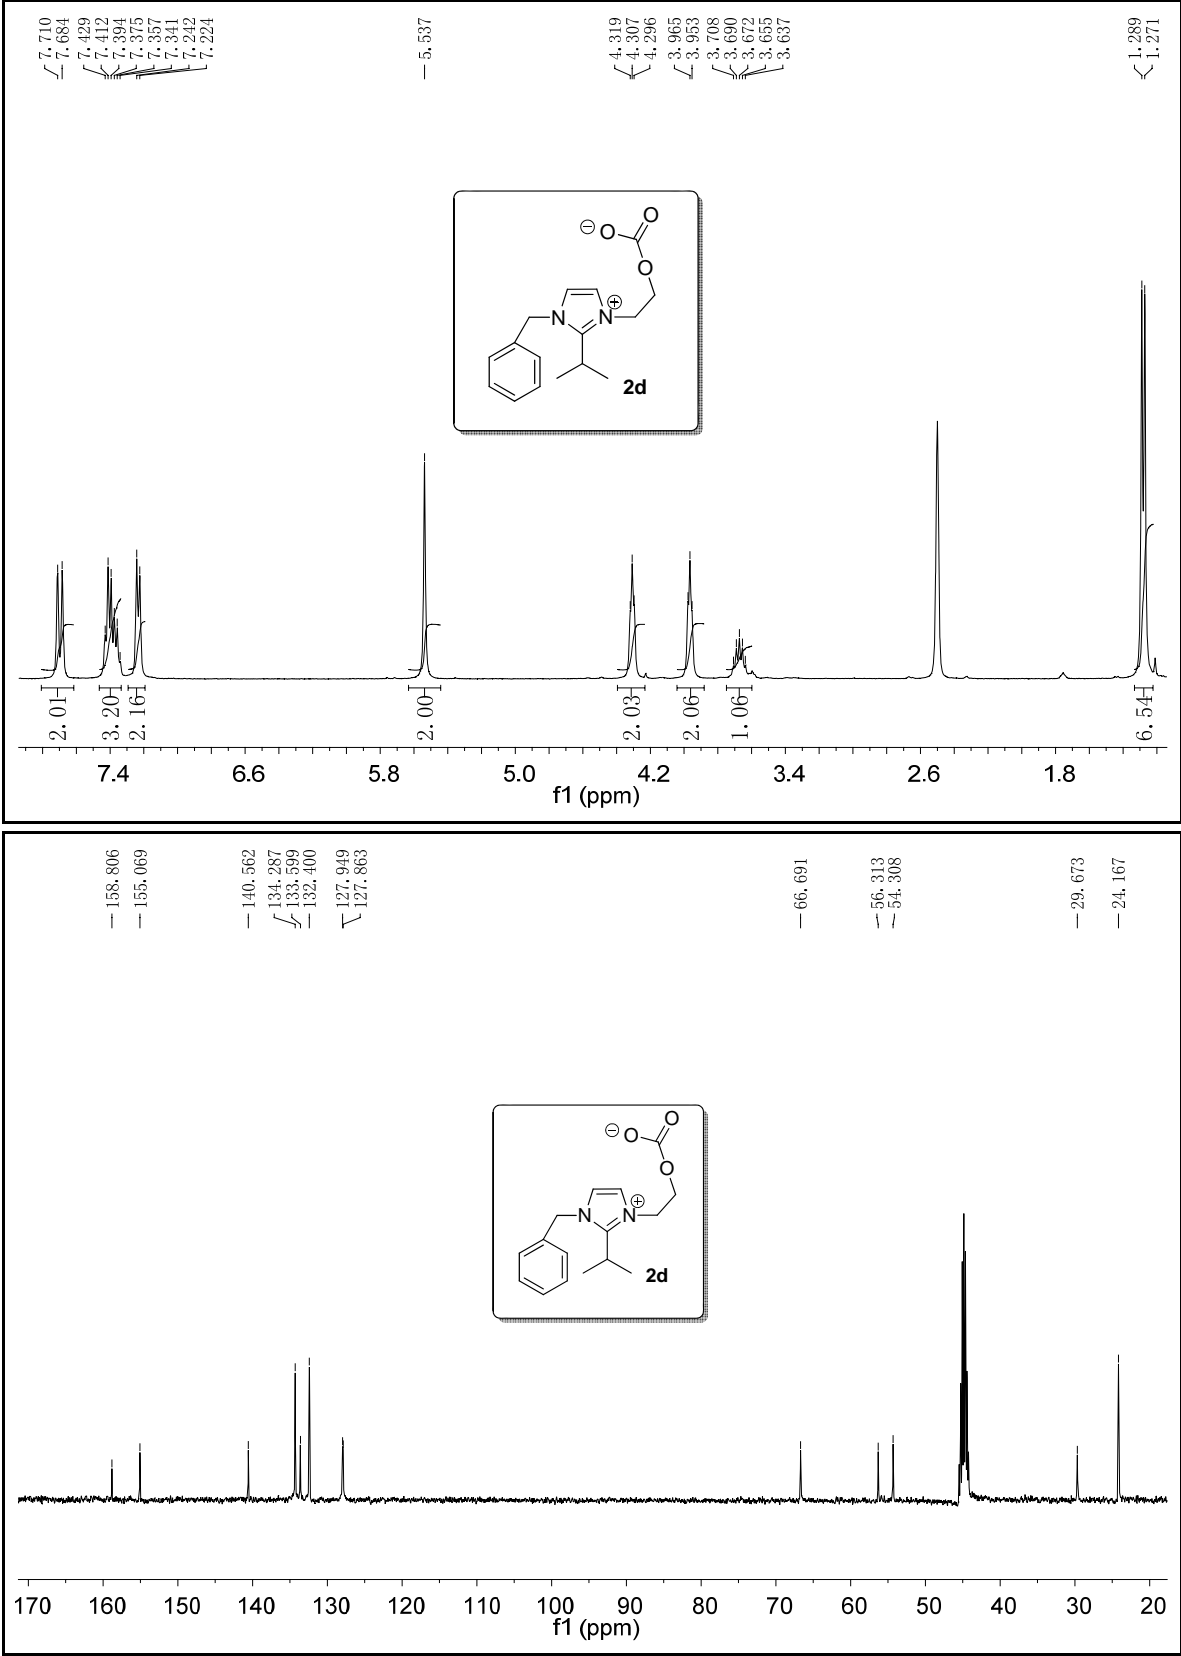

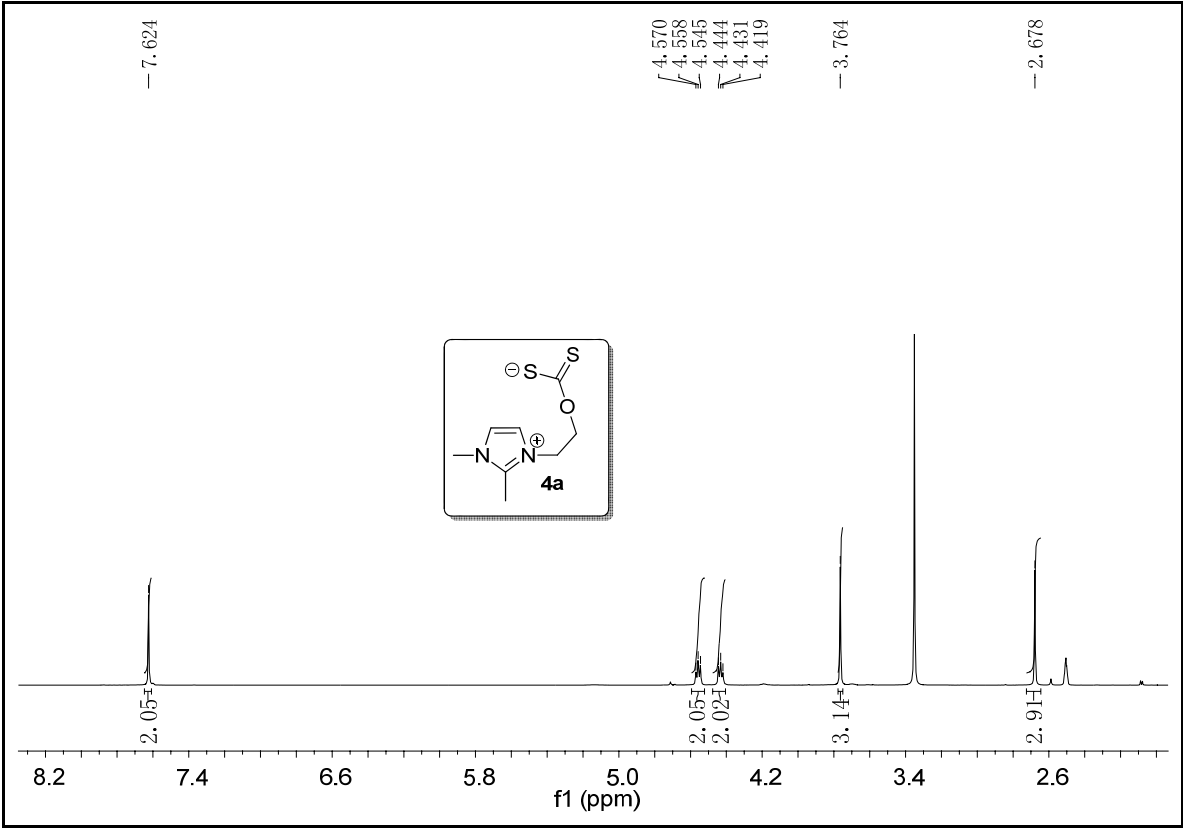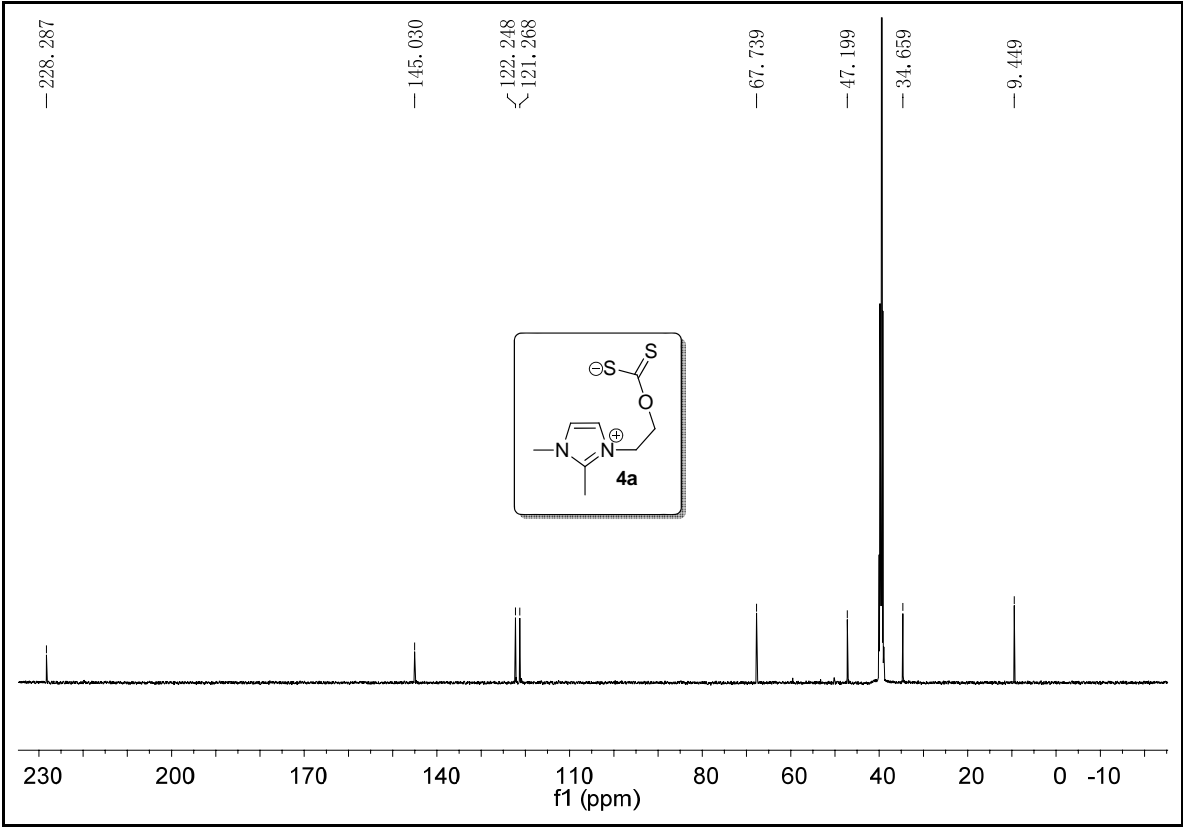



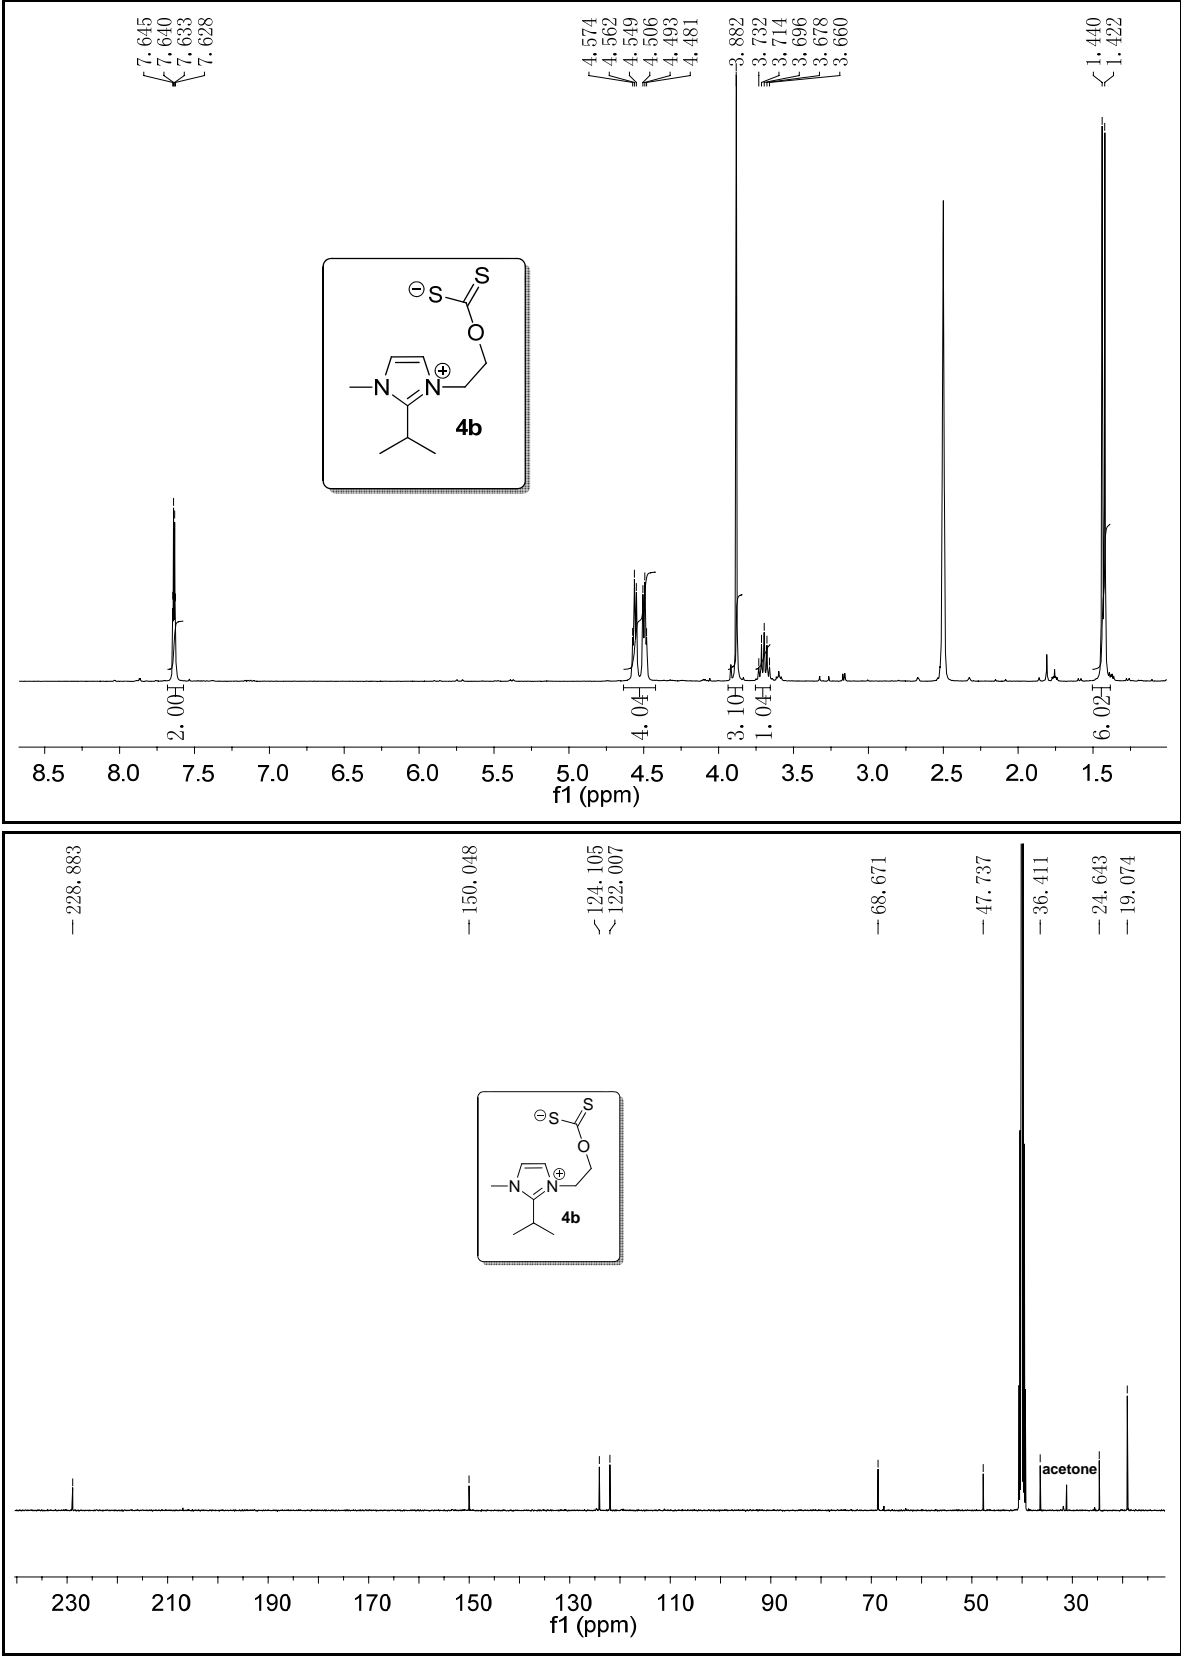

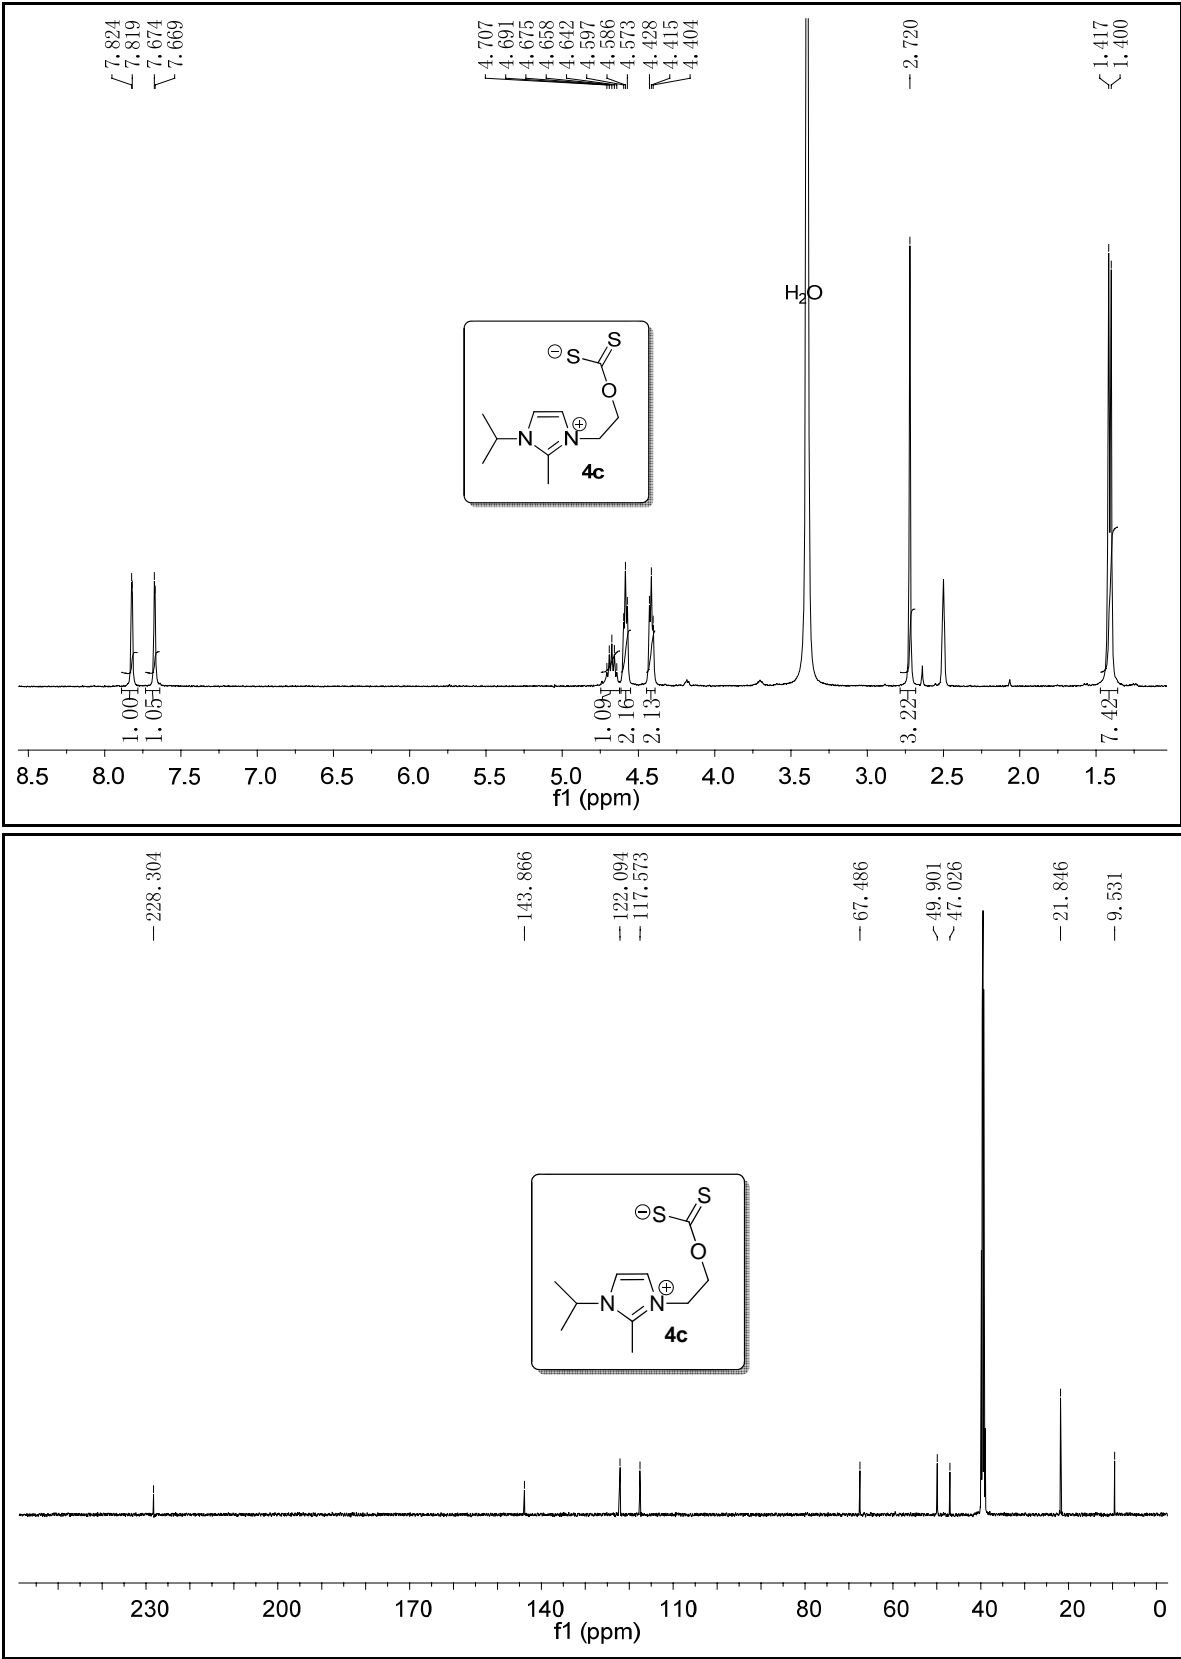

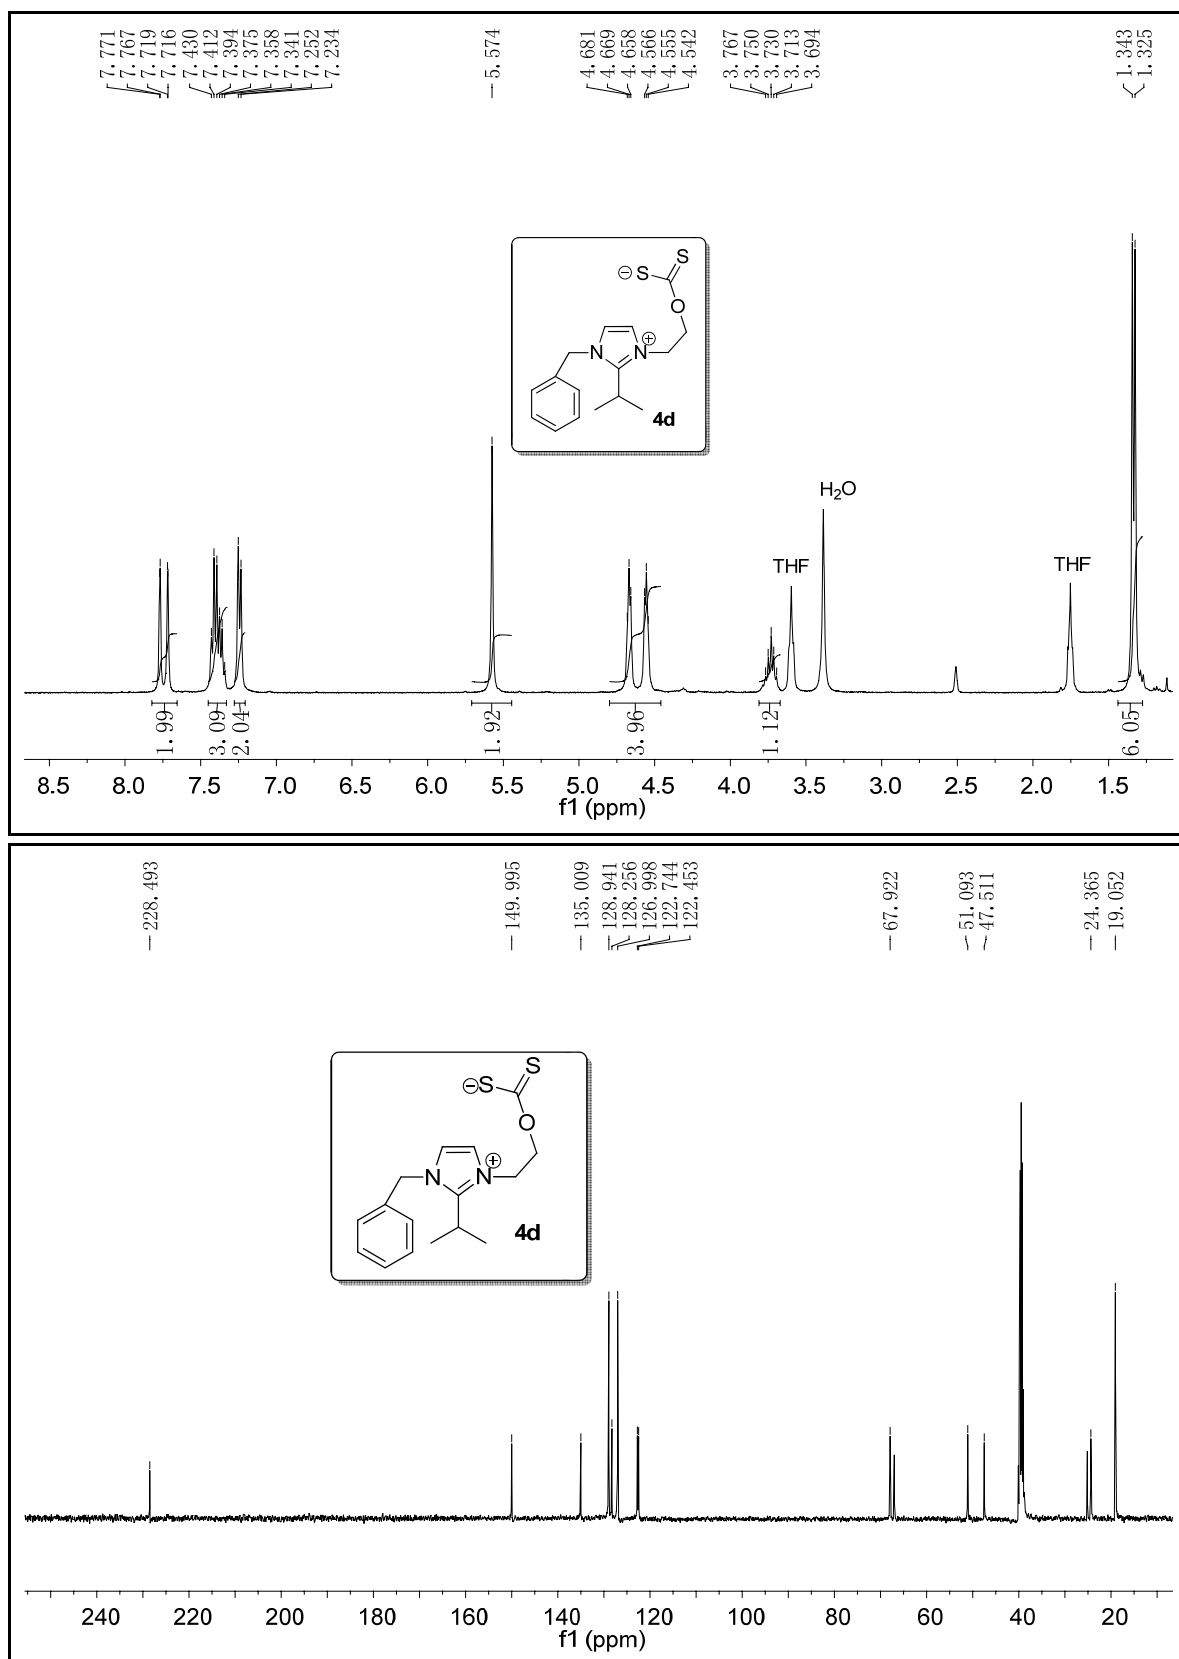

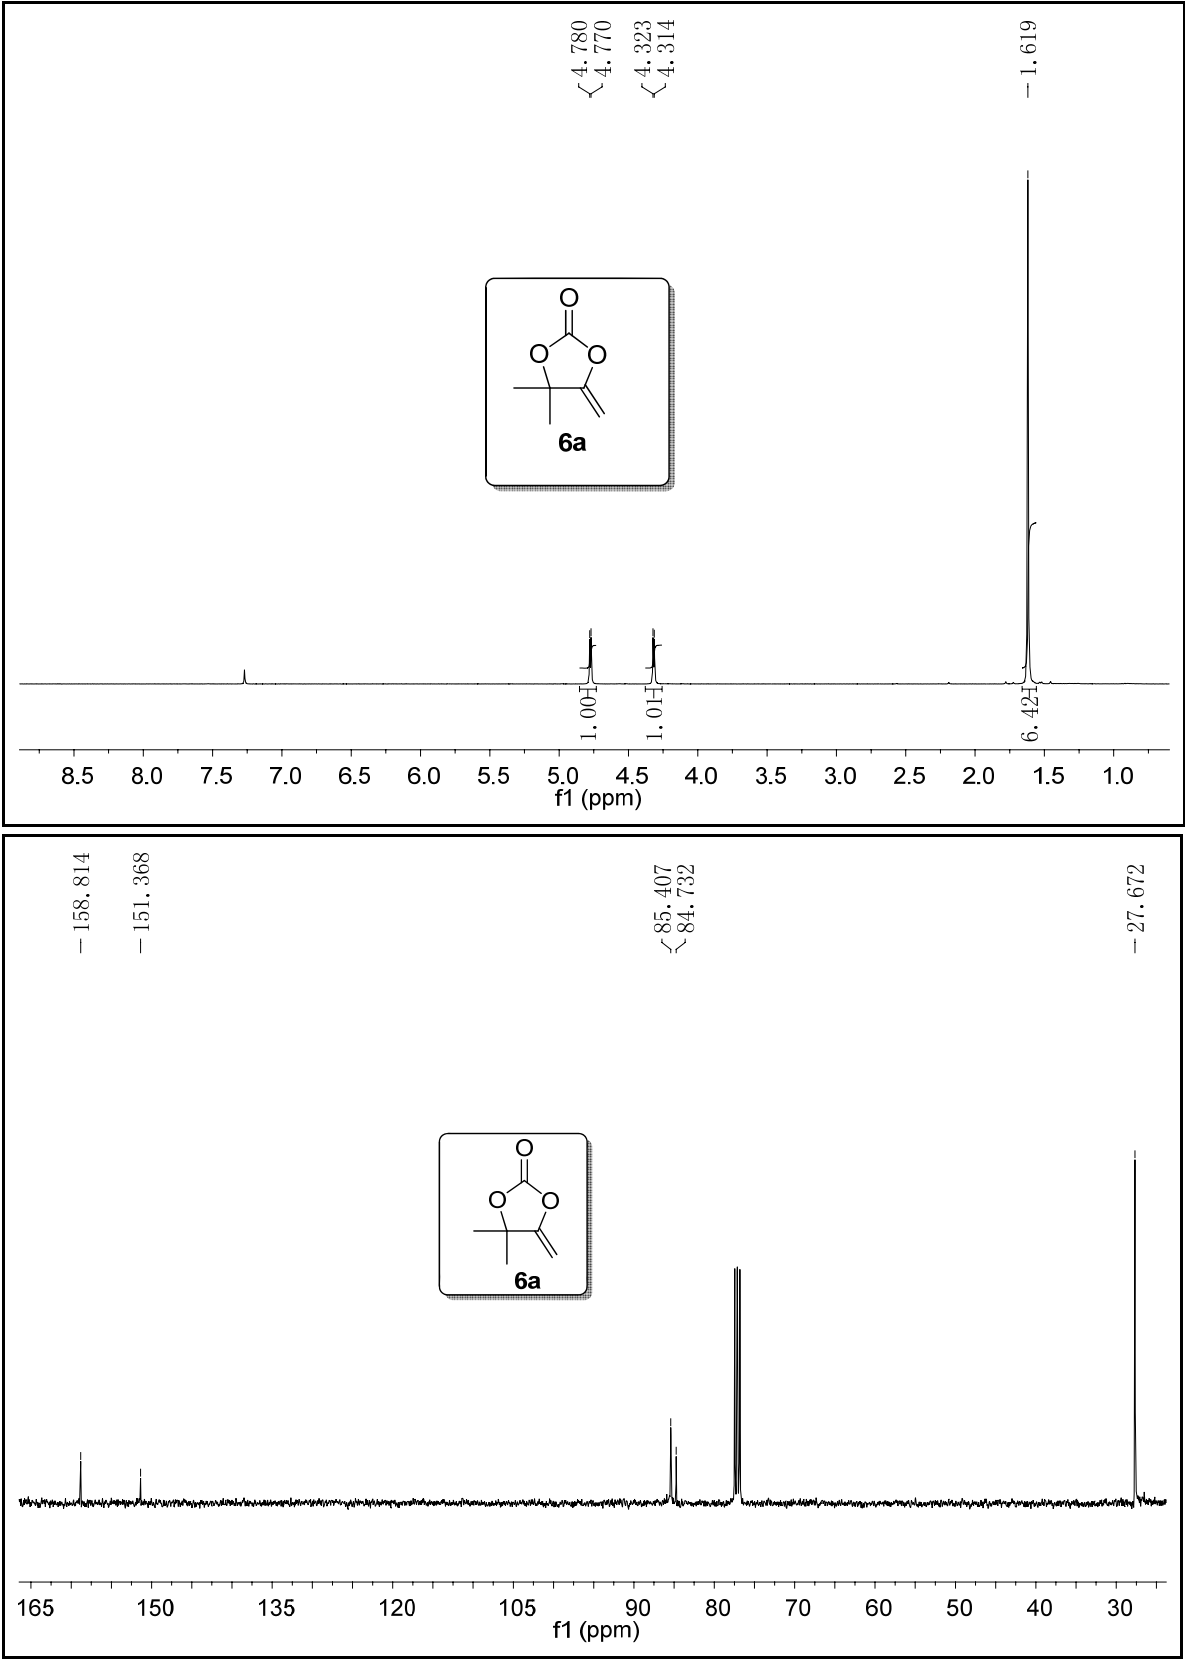

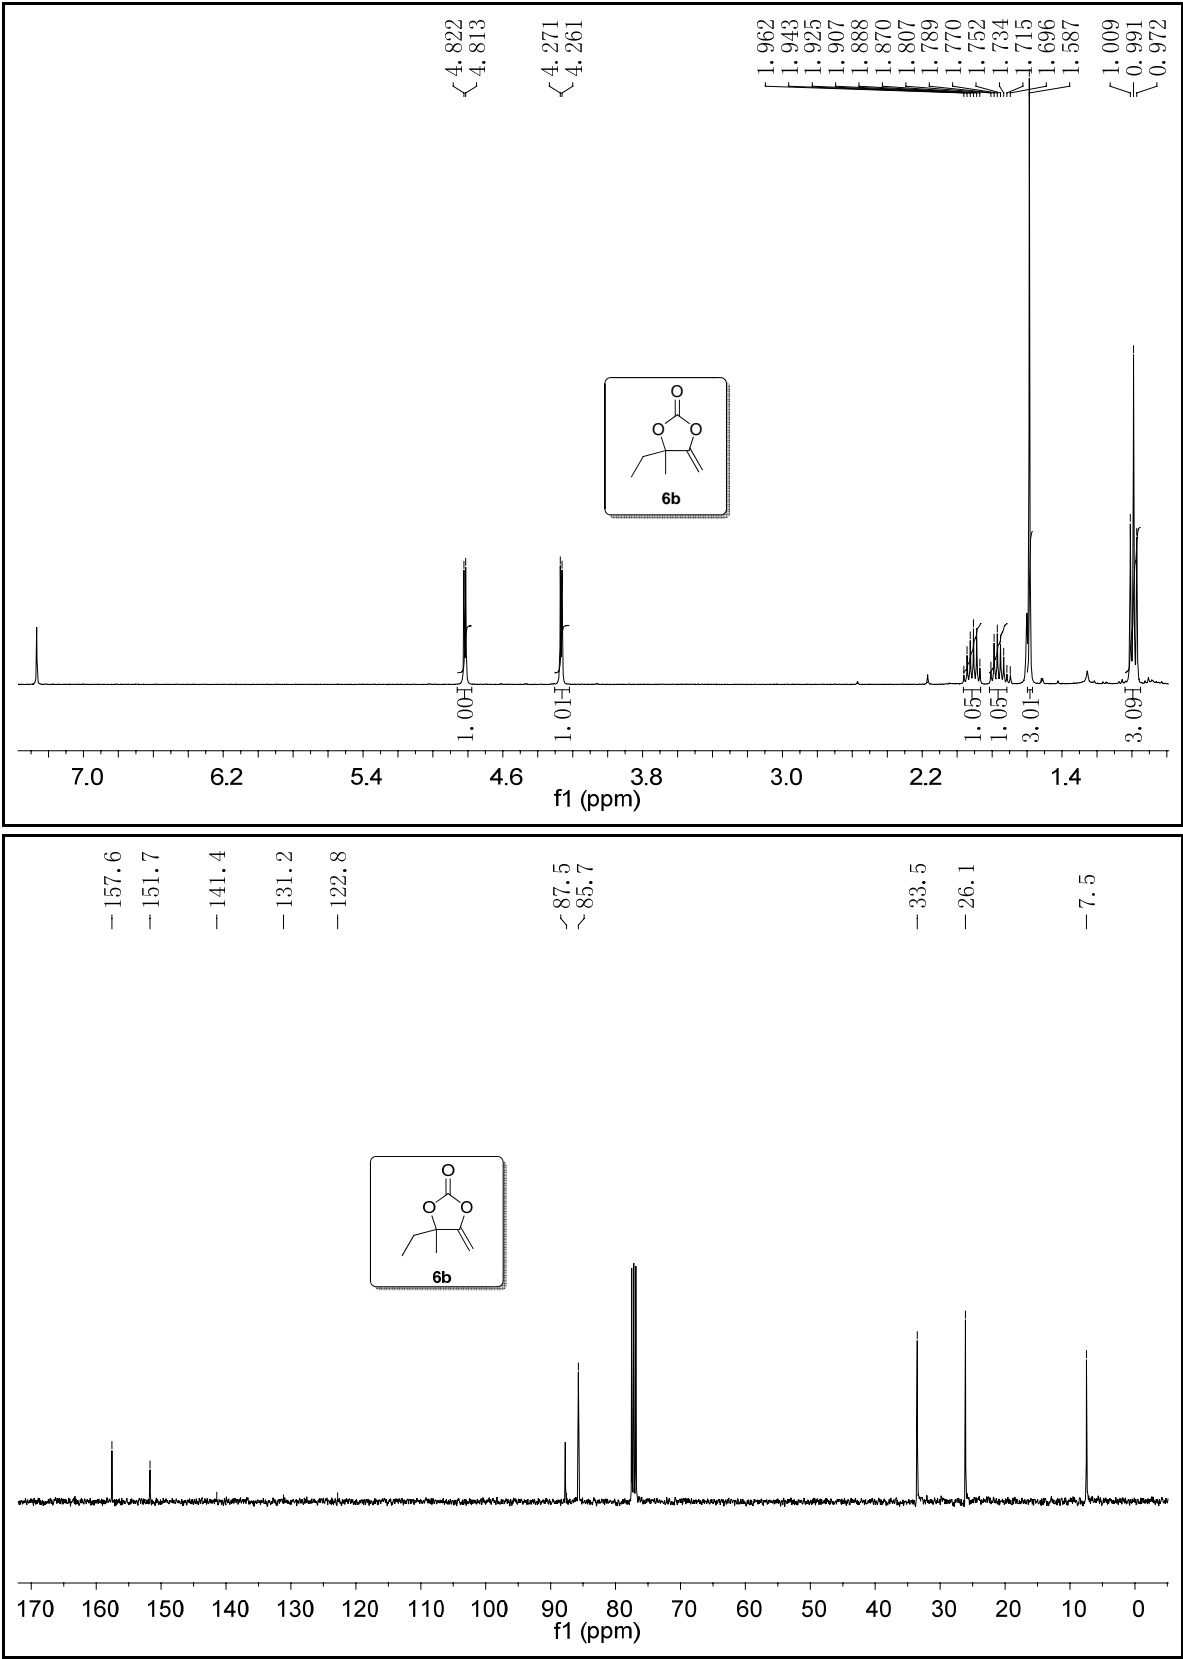

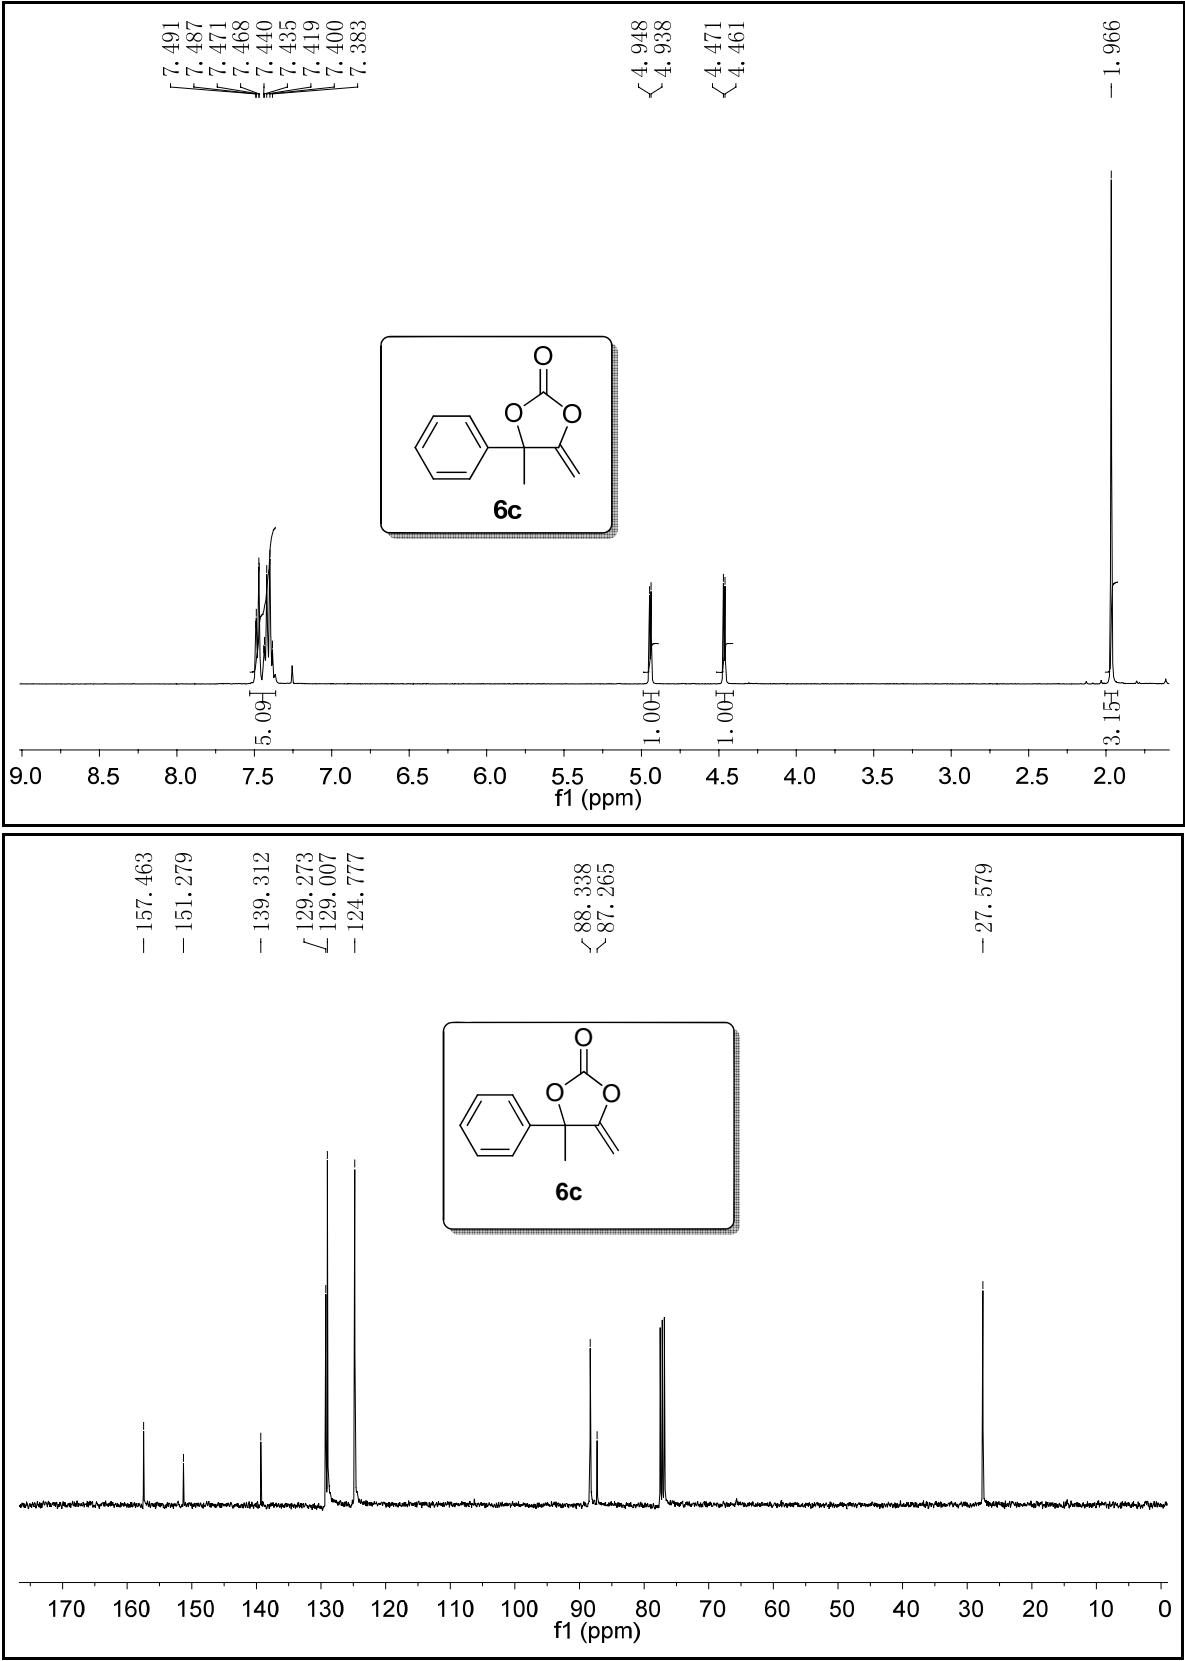

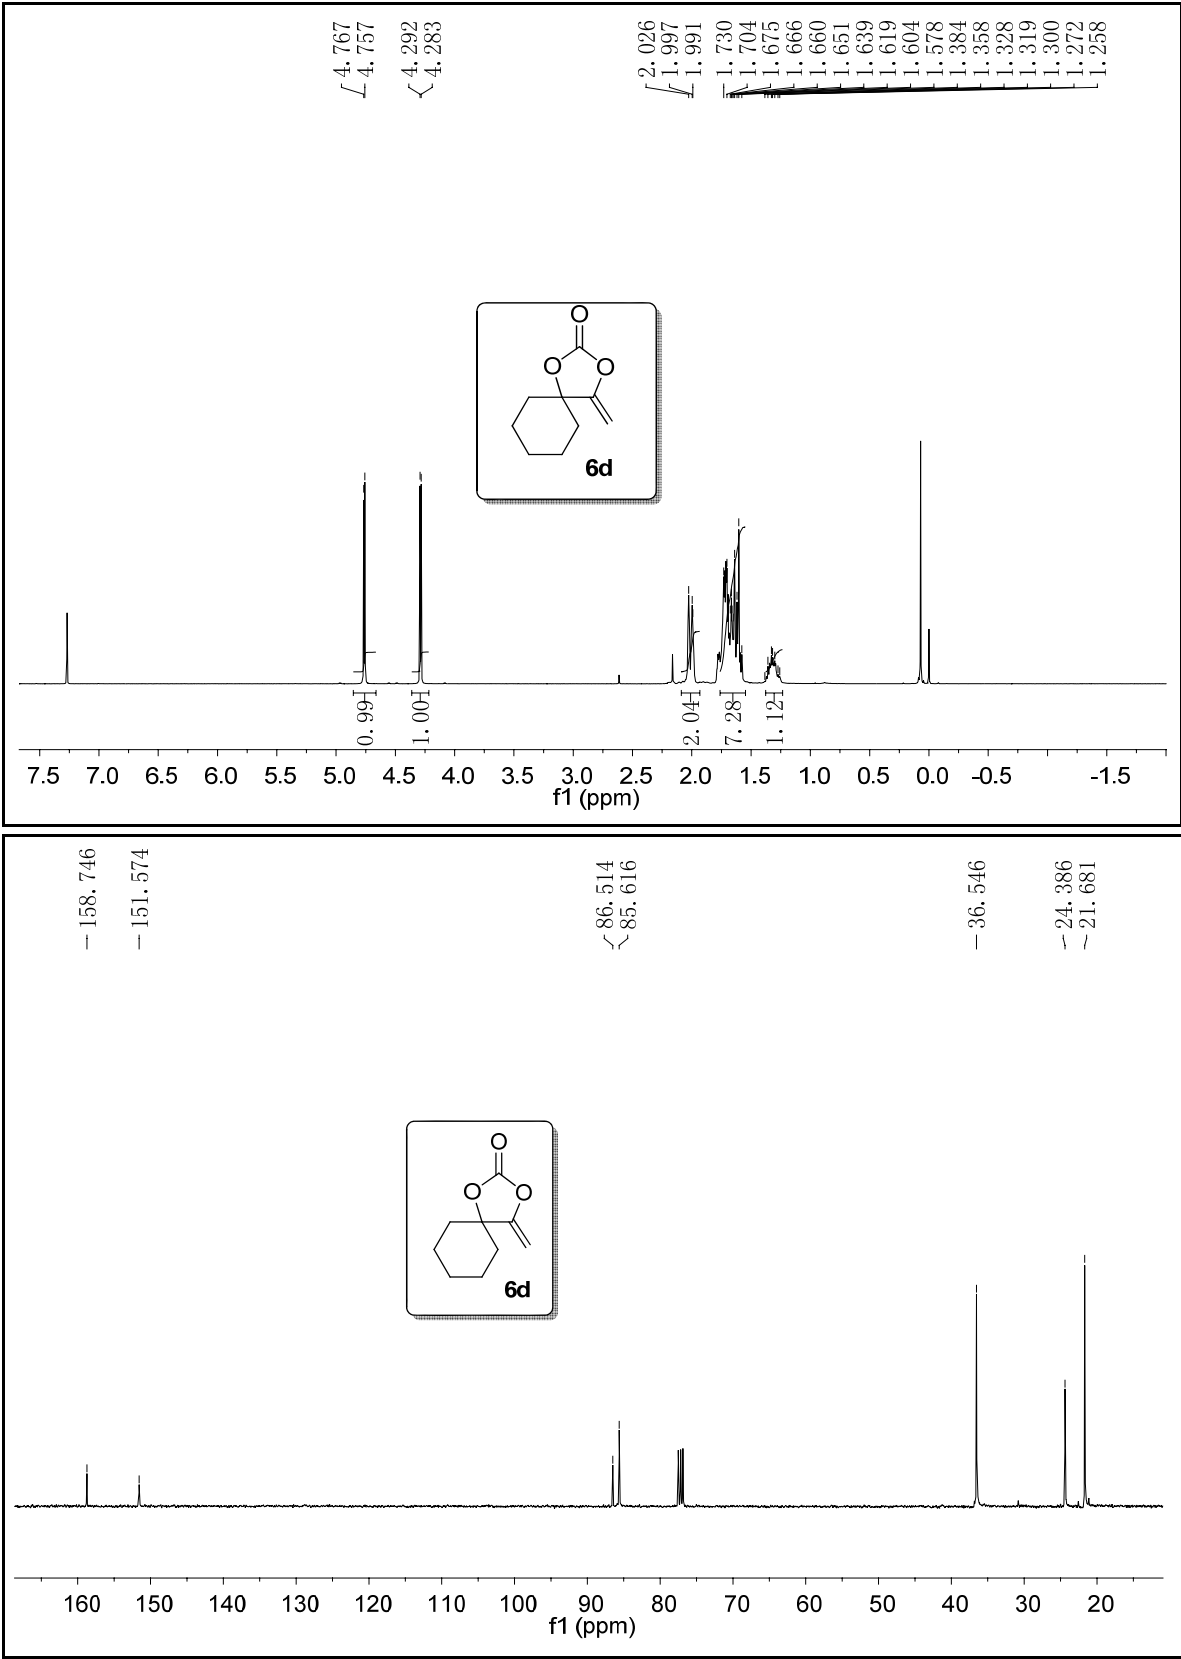

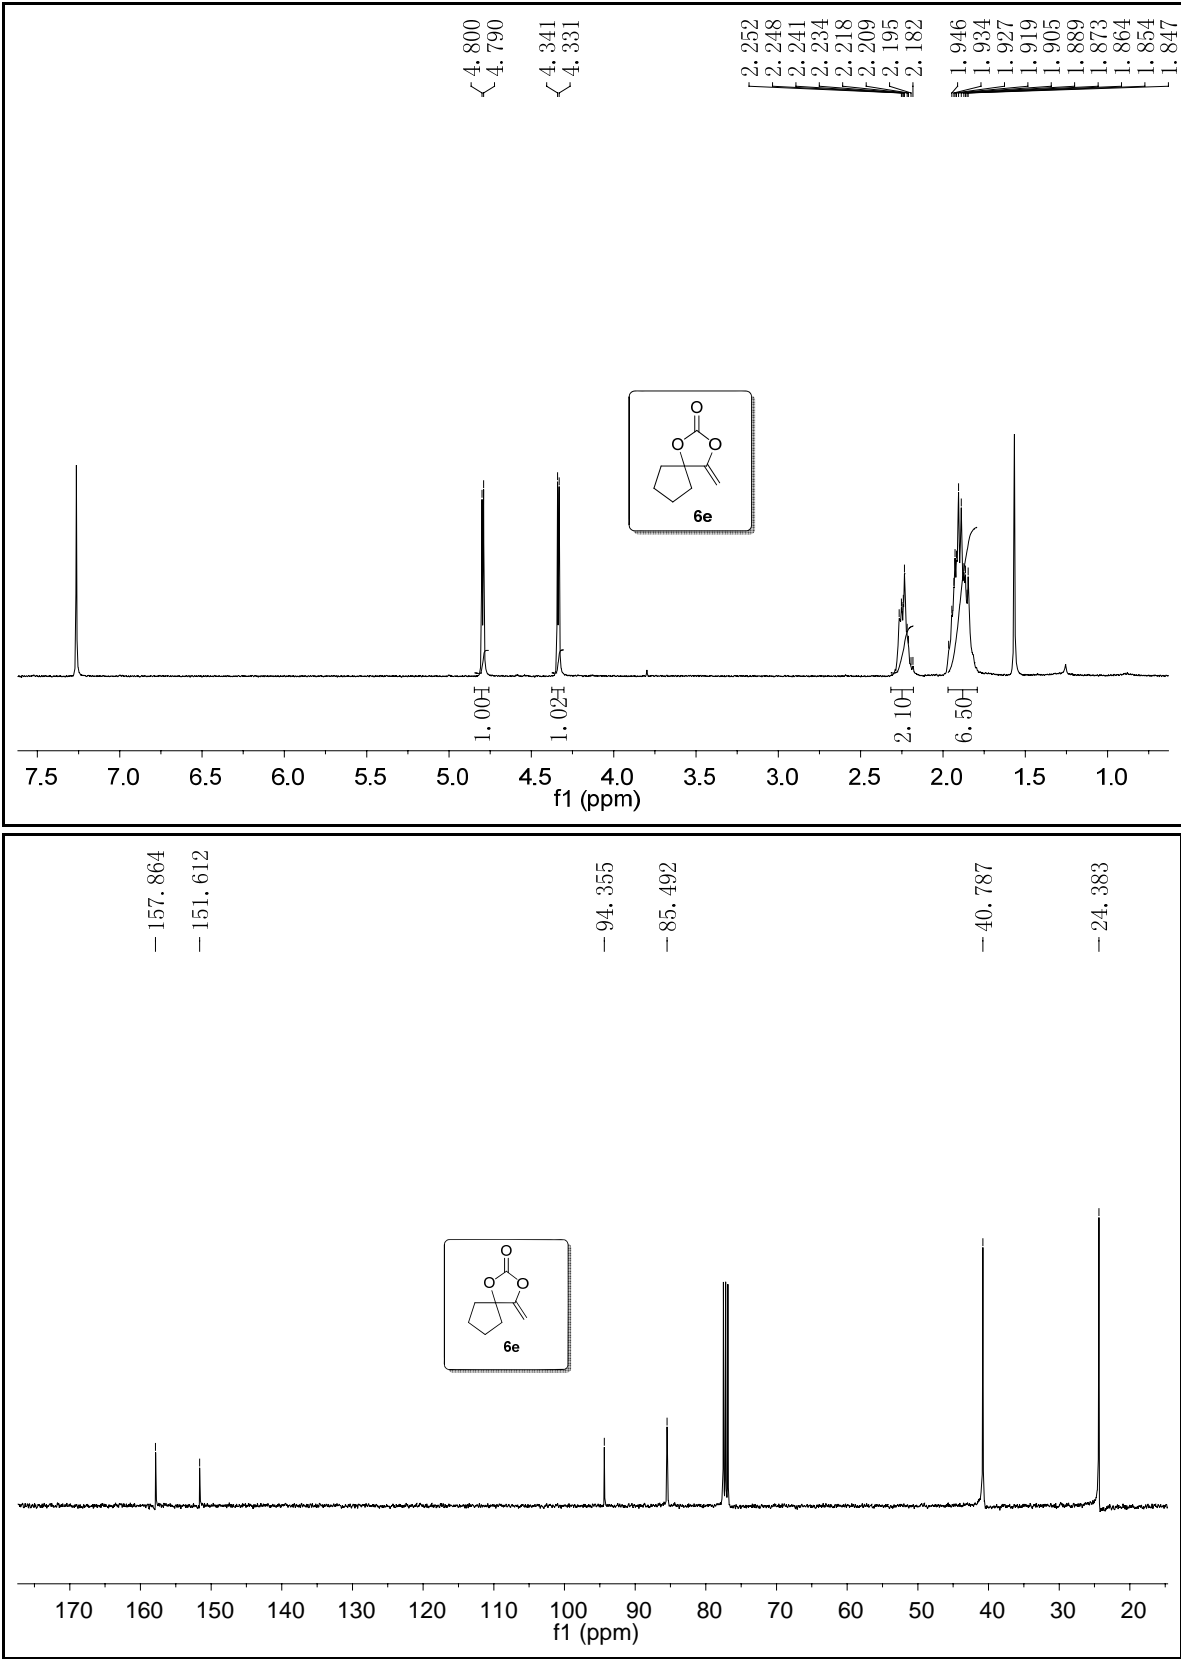



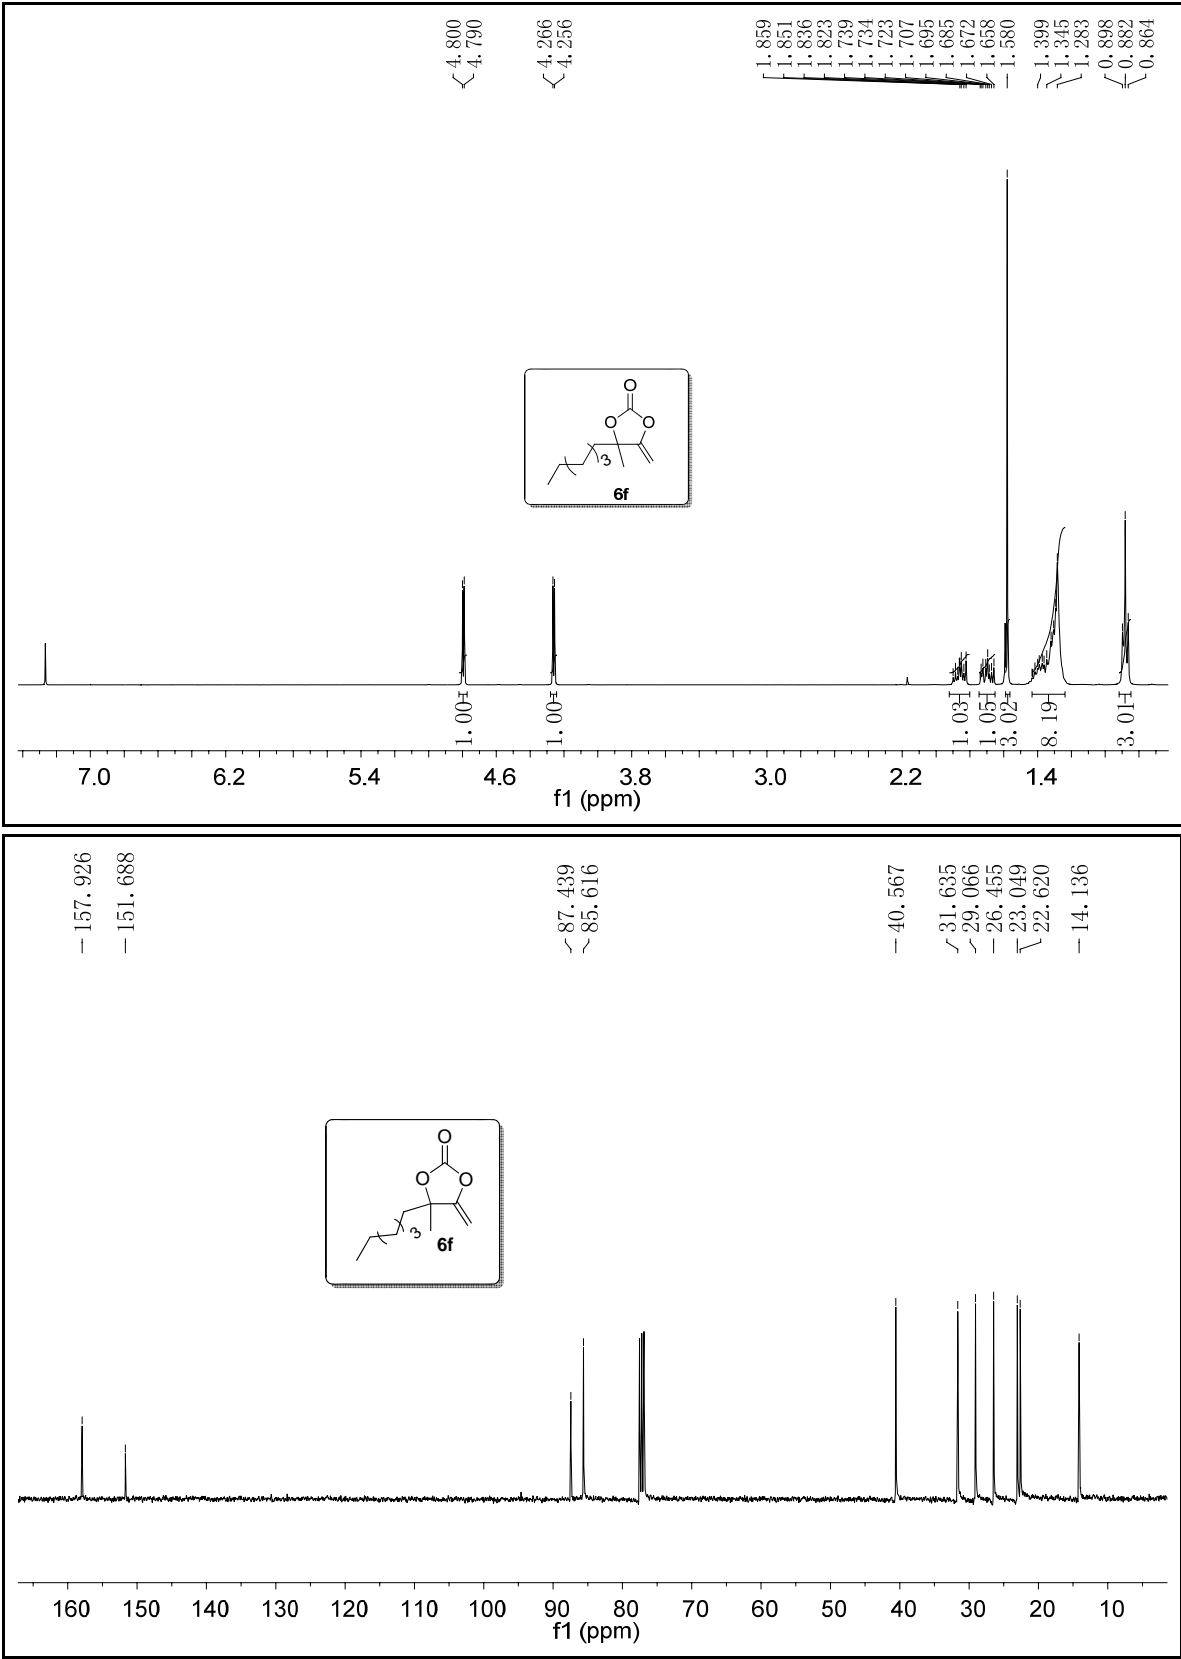

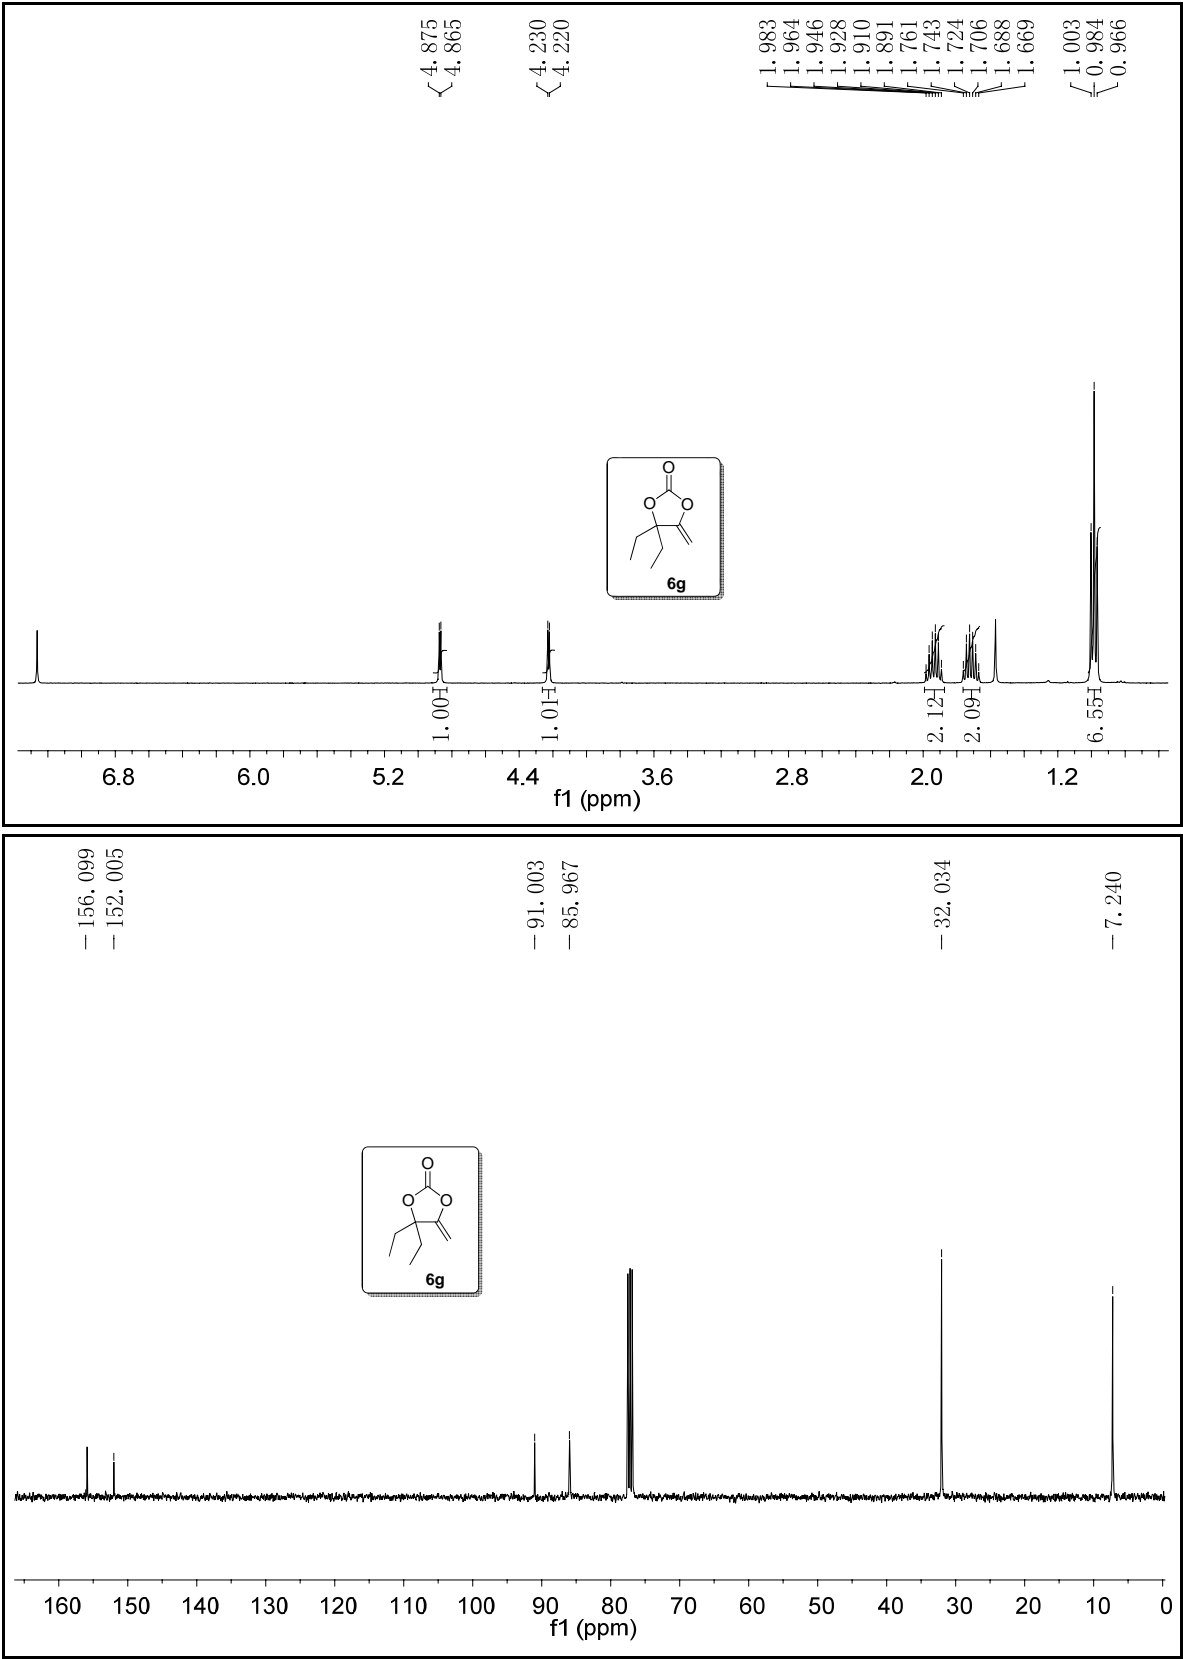

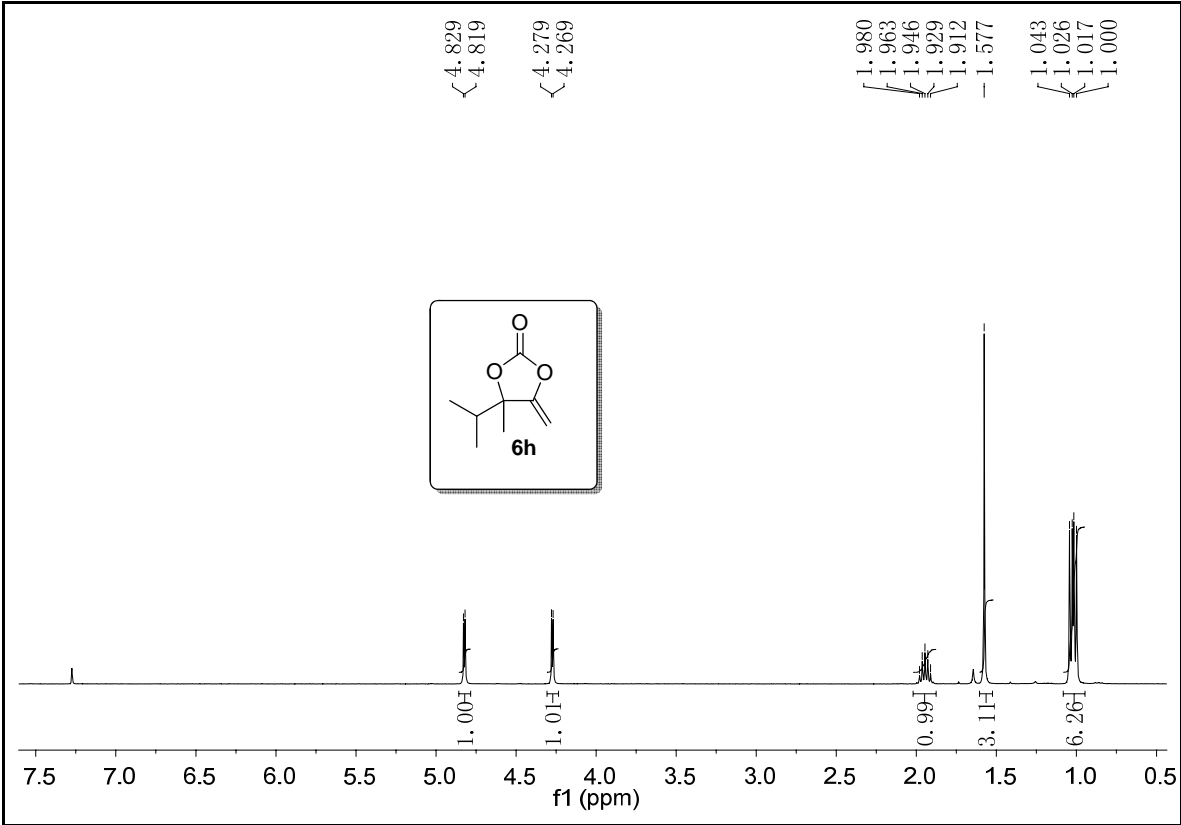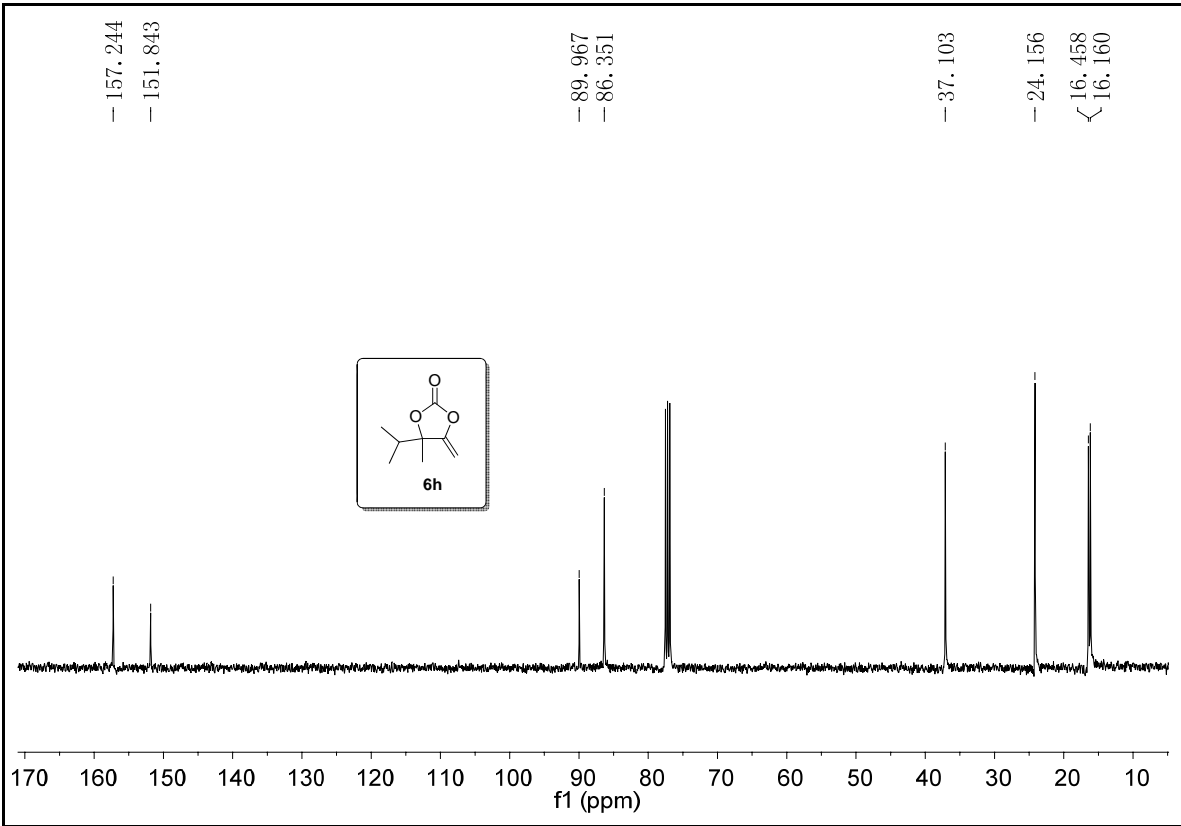

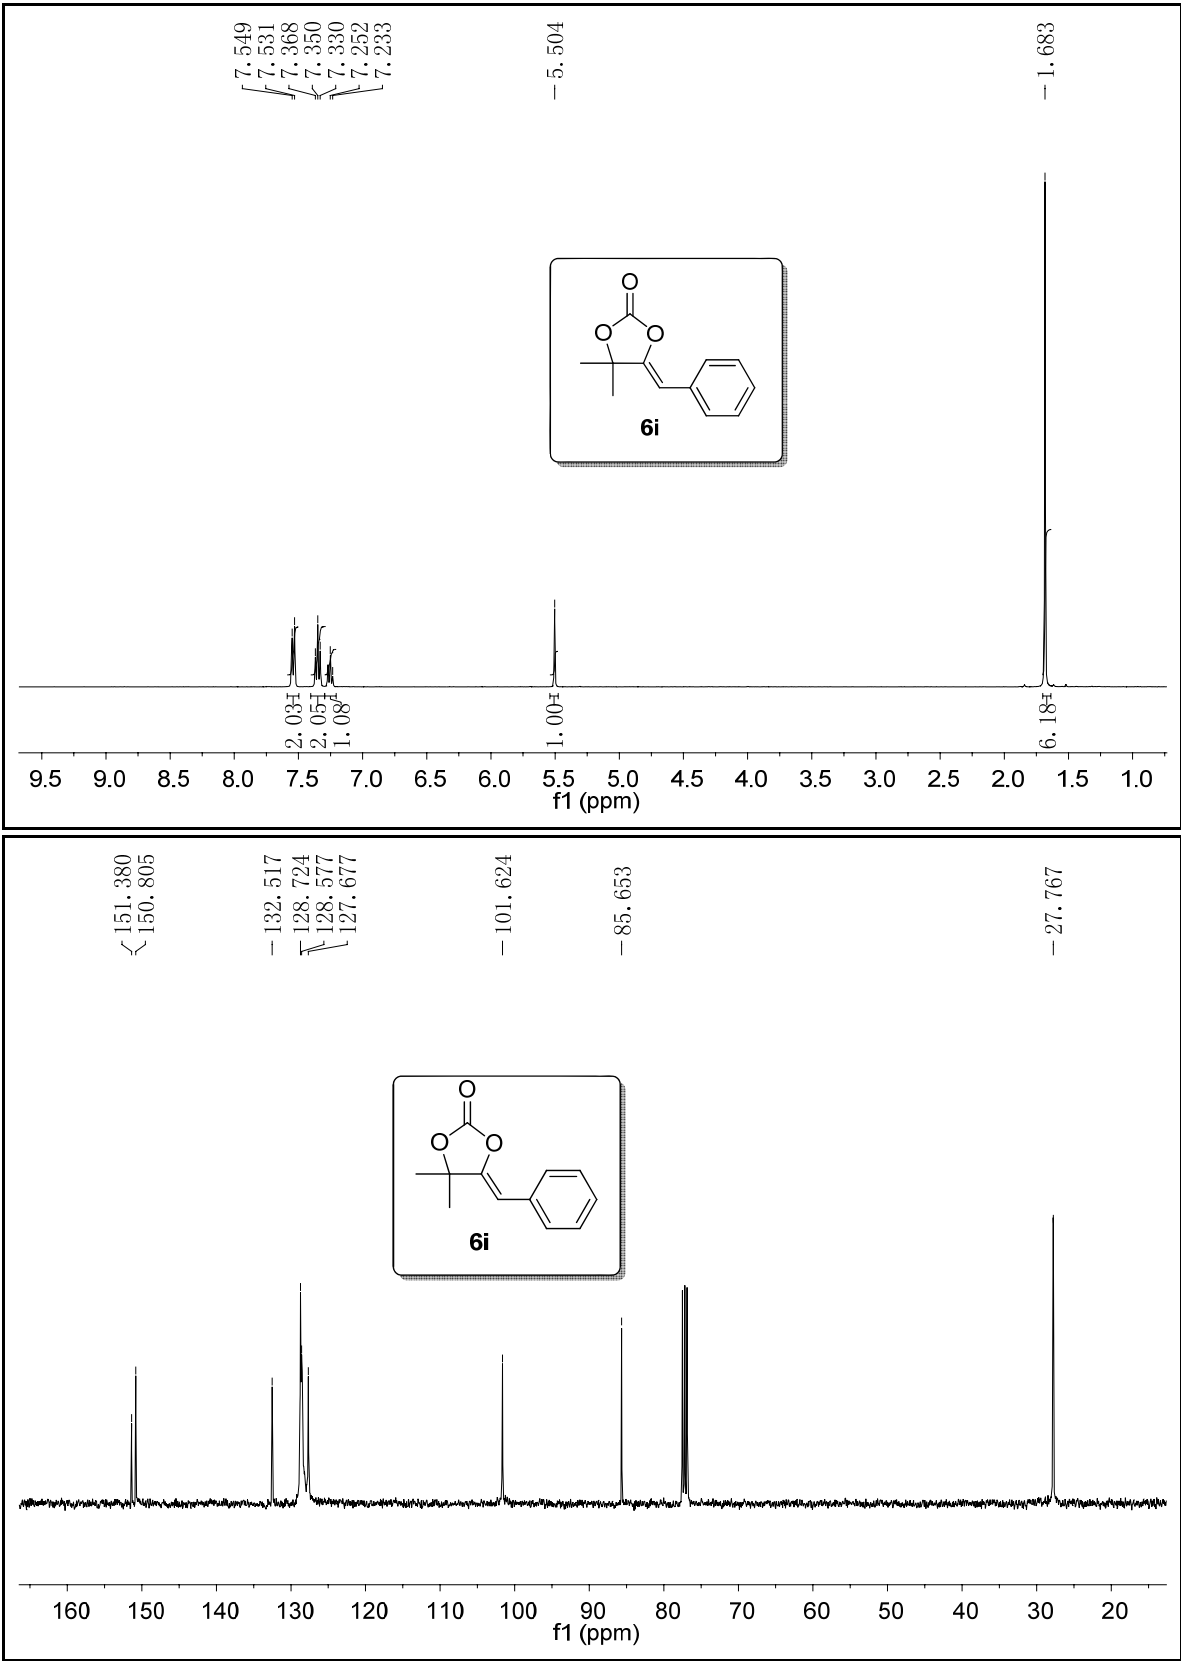

Supplement: c3gc42346h.pdf [file c3gc42346h.pdf]
